# Supplementary material for: Fluorescent aryl naphthalene dicarboximides with large Stokes shifts and strong solvatochromism controlled by dynamics and molecular geometry
Source: Royal Society of Chemistry journal article supplement (doi:10.1039/c6tc04453k), 2016-01-01
Supplement: c6tc04453k1.pdf [file c6tc04453k1.pdf]

## Fluorescent Aryl Naphthalene Dicarboximides with Large Stokes' Shifts and Strong Solvatochromism Controlled by Dynamics and Molecular Geometry

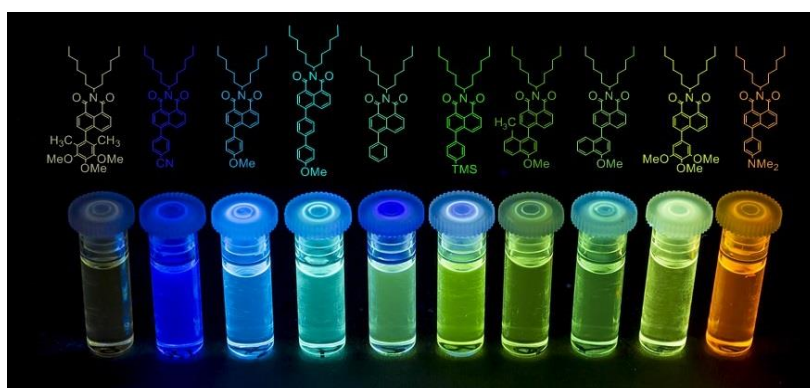

Robert Greiner, Thorben Schlücker<sup>†</sup>, Dominik Zgela and Heinz Langhals\*

LMU Ludwig-Maximilians-Universität München, Department Chemie  
Butenandtstrasse 5-13, Haus F, 81377 München (Germany)

Fax: (+49) 089 2180 77640

e-mail: [Langhals@lrz.uni-muenchen.de](mailto:Langhals@lrz.uni-muenchen.de)

### Supporting Information

#### Table of Contents

|      |                                                                                                                          |    |
|------|--------------------------------------------------------------------------------------------------------------------------|----|
| 1.   | General Information                                                                                                      | 2  |
| 2.   | Preparation of aryl dioxaborolanes                                                                                       | 3  |
| 3.   | Preparation of bromonaphthalene dicarboximide <b>2</b>                                                                   | 3  |
| 4.   | Analysis of the solvatochromism of naphthalimides <b>3</b>                                                               | 4  |
| 4.1. | Analysis of the solvatochromism of compounds <b>3</b> according to Kowski's method                                       | 4  |
| 4.2. | Analysis of solvatochromism of compounds <b>3</b><br>by means of the multi parameter approach of Kamlet, Taft and Abboud | 10 |
| 4.3. | Analysis of solvatochromism of compounds <b>3</b><br>by means of the multi parameter approach of Catalán                 | 11 |
| 5.   | NMR-spectra                                                                                                              | 13 |
| 6.   | IR-spectra                                                                                                               | 25 |
| 7.1. | Additional optical spectroscopy data                                                                                     | 27 |
| 7.2. | Gaussian analysis of the fluorescence spectra of <b>3g</b> in various solvents                                           | 29 |
| 8.   | Solvatochromism of <b>3</b> according to Dimroth and Reichardt                                                           | 39 |
| 9.   | Additional optical spectra                                                                                               | 41 |
| 10.  | Quantum chemical calculations                                                                                            | 47 |
| 11.  | References                                                                                                               | 50 |

## 1. General Information

All reactions were carried out under an argon atmosphere in flame-dried glassware. Syringes which were used to transfer anhydrous solvents or reagents were purged with argon prior to use. Available standard chemicals were applied in synthesis grade without further purification. 1-Butanol, chloroform, hexane and toluene were used in spectrophotometric grade. DMF, tetradecane and 1-undecanol were used in p.a. grade and stored over 3 Å molar sieve. Toluene and THF were continuously refluxed and freshly distilled from sodium benzophenone ketyl under nitrogen and stored over 4 Å molecular sieves. Yields refer to isolated compounds estimated to be > 95 % pure as determined by  $^1\text{H}$  NMR (25 °C) and capillary GC. Chemical shifts are reported as  $\delta$ -values in ppm relative to the solvent peak. NMR spectra were recorded in a solution of  $\text{CDCl}_3$  (residual chloroform:  $\delta = 7.27$  ppm for  $^1\text{H}$  NMR and  $\delta = 77.0$  ppm for  $^{13}\text{C}$  NMR). Abbreviations for signal coupling are as follows: s, singlet; br s, broad singlet; d, doublet; t, triplet; q, quartet; quin, quintet; sxt, sextet; m, multiplet. Infrared spectra were recorded from 4000-400  $\text{cm}^{-1}$  on a Perkin 281 IR spectrometer. Samples were measured neat (ATR, Smiths Detection DuraSample IR II Diamond ATR). The absorption bands were reported in wave numbers ( $\text{cm}^{-1}$ ). Mass Spectra were recorded on Finnigan MAT 95Q or Finnigan MAT 90 instrument for electron impact ionization (EI). High Resolution Mass Spectra (HRMS) were recorded on the same instrument. UV/Vis spectra were obtained with a Varian Cary 5000 spectrometer. Fluorescence spectra were obtained with a Varian Cary Eclipse spectrometer, slit width 2.5 nm. Fluorescence lifetimes  $\tau$  were obtained with a PicoQuant 300 lifetime spectrometer and a PicoQuant P-C-405 as lightsource. Column chromatography was performed using  $\text{SiO}_2$  (0.040 – 0.063 mm, 230 – 400 mesh ASTM) from Merck if not indicated. All reagents were obtained from commercial sources and used without further purification if not otherwise stated.

## 2. Preparation of aryl dioxaborolanes

4-(Trimethylsilyl)phenylboronic acid and the pinacol esters of phenylboronic acid, 4-methoxyphenylboronic acid, 4-(*N,N*-dimethylamino)phenylboronic acid and 4-cyanophenylboronic acid have been purchased from commercial sources.

2-(4-Methoxynaphthalen-1-yl)-4,4,5,5-tetramethyl-1,3,2-dioxaborolane, 4,4,5,5-tetramethyl-2-(3,4,5-trimethoxyphenyl)-1,3,2-dioxaborolane and 2-(4-methoxy-8-methylnaphthalen-1-yl)-4,4,5,5-tetra-methyl-1,3,2-dioxaborolane have been prepared by reacting the corresponding aryl bromides<sup>SI-1</sup> with bis(pinacolato)diboron according to standard procedures.<sup>SI-2</sup>

## 3. Preparation of bromonaphthalene dicarboximide **2**<sup>SI-3</sup>

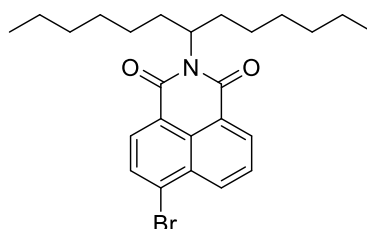

A mixture of tridecan-7-amine (6.60 g, 33.0 mmol, 1.50 equiv) and 4-bromo-1,8-naphthalic anhydride (6.00 g, 22.0 mmol, 1.00 equiv) in ethylene glycol (50 mL) was heated at 160 °C. After 12 h, hydrochloric acid (2 M, 50 mL) was added to the reaction mixture, which was subsequently extracted with CHCl<sub>3</sub> (3 x 50 mL). The combined organic phases were dried over MgSO<sub>4</sub> and concentrated *in vacuo*. Column chromatography (CHCl<sub>3</sub>) gave **2** as yellow oil (9.05 g, 90%).

## 4. Analysis of the solvatochromism of naphthalimides 3

### 4.1. Analysis of the solvatochromism of compounds 3 according to Kawski's method

The solvatochromism of the series of **3** was analysed with the method reported by Kawski and coworkers.<sup>12,SI-4</sup> There, the function  $f_{BK}$  was established by means of equation (SI-1) and the function  $g_{BK}$  by means of equation (SI-2), respectively, where  $n$  is the index of refraction of the solvent and  $\varepsilon$  the relative permittivity.

$$f_{BK} = \frac{2n^2 + 1}{n^2 + 2} \left( \frac{\varepsilon - 1}{\varepsilon + 2} - \frac{n^2 - 1}{n^2 + 2} \right) \quad (\text{SI-1})$$

$$g_{BK} = \frac{3}{2} \frac{n^4 - 1}{(n^2 + 2)^2} \quad (\text{SI-2})$$

Characteristic indicators for solvent effects are  $m_1$  obtained as the slope of a linear plot of the Stokes' shift  $\nu_{\text{abs}} - \nu_{\text{flu}}$  (in kK as wavenumbers  $1000 \text{ cm}^{-1}$ ) versus  $f_{BK}$  and  $m_2$  as the slope of the sum of the wavenumbers of the maxima of UV/Vis absorption and fluorescence  $\nu_{\text{abs}} + \nu_{\text{flu}}$  versus  $f_{BK} + 2g_{BK}$  and are reported in Table SI-1.

Table SI-1. Slopes  $m_1$  and  $m_2$  and correlation numbers  $r_{(m1)}$  and  $r_{(m2)}$  (6 solvents except **3c** with 5 solvents; solvents: 1-Butanol, 1-undecanol, *N,N*-dimethylformamide, toluene (except for **3h**), *n*-hexane, *n*-tetradecane.  $\mu_e/\mu_g$ : Calculated ratio of dipole moments in electronically excited  $\mu_e$  and the ground state  $\mu_g$ . according to equation (SI-3).

| Nr.       | $m_1$<br>kK | $r_{(m1)}$ | $m_2$<br>kK | $r_{(m2)}$ | $\mu_e/\mu_g$ |
|-----------|-------------|------------|-------------|------------|---------------|
| <b>3a</b> | 0.51        | 0.917      | -3.00       | -0.976     | 1.4           |
| <b>3b</b> | 3.06        | 0.989      | -5.11       | -0.979     | 4.0           |
| <b>3c</b> | 5.24        | 0.928      | -10.21      | -0.959     | 3.1           |
| <b>3d</b> | 5.89        | 0.960      | -7.56       | -0.978     | 8.0           |
| <b>3g</b> | 6.69        | 0.956      | -7.21       | -0.975     | 26.7          |
| <b>3h</b> | 6.32        | 0.957      | -6.93       | -0.977     | 21.7          |
| <b>3i</b> | 0.69        | 0.911      | -2.94       | -0.930     | 1.6           |
| <b>3j</b> | 3.24        | 0.989      | -5.29       | -0.975     | 4.2           |
| <b>3l</b> | 5.80        | 0.998      | -8.01       | -0.992     | 6.2           |

$$\frac{\mu_e}{\mu_g} = \frac{|m_1| + |m_2|}{|m_2| - |m_1|} \quad (\text{SI-3})$$

The ratio  $\mu_e/\mu_g$  according to equation (SI-3) indicates the alteration of the dipole moment in the electronically excited state  $\mu_e$  and the ground state  $\mu_g$  for parallel transition moments. We applied  $\mu_e/\mu_g$  according to equation (SI-3) as a scale for the solvent influence on the electronic spectra. A clear maximum was found for the preferred **3g** verifying the concept of twisted donor acceptor systems for strong solvatochromism. This exceeds even the effect of the prolonged electronic system in **3l**.

The linear correlations on the basis of  $f_{\text{BK}}$  and  $g_{\text{BK}}$  are reported in the subsequent Fig. SI-1 to SI-9.

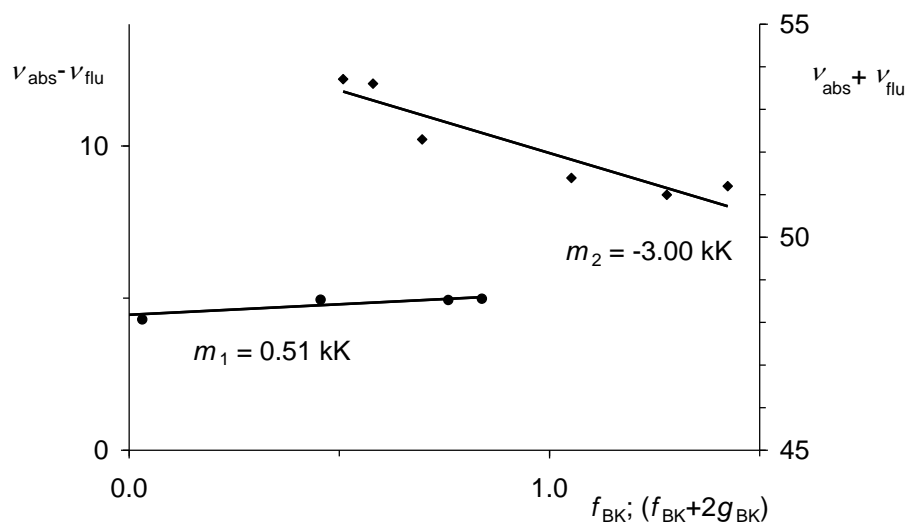

Fig. SI-1. Linear correlations of the Stokes' shift  $\nu_{\text{abs}} - \nu_{\text{flu}}$  (in  $1000 \text{ cm}^{-1}$ ) of **3a** versus  $f_{\text{BK}}$  to obtain  $m_1$  and of the sum  $\nu_{\text{abs}} + \nu_{\text{flu}}$  versus  $f_{\text{BK}} + 2g_{\text{BK}}$  to obtain  $m_2$ .

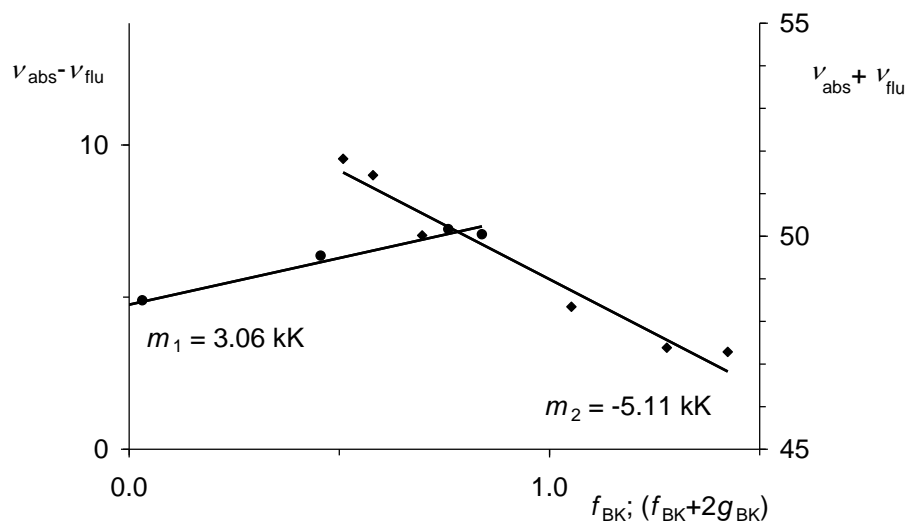

Fig. SI-2. Linear correlations of the Stokes' shift  $\nu_{\text{abs}} - \nu_{\text{flu}}$  (in  $1000 \text{ cm}^{-1}$ ) of **3b** versus  $f_{\text{BK}}$  to obtain  $m_1$  and of the sum  $\nu_{\text{abs}} + \nu_{\text{flu}}$  versus  $f_{\text{BK}} + 2g_{\text{BK}}$  to obtain  $m_2$ .

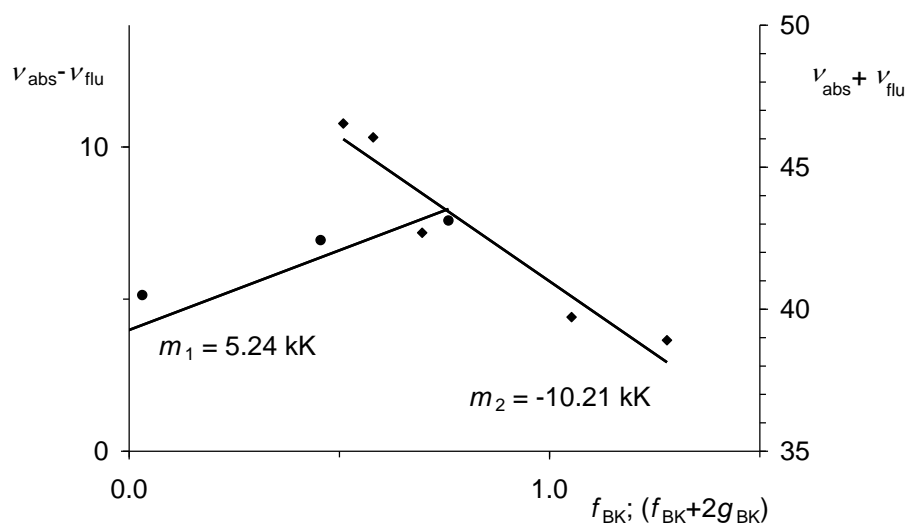

Fig. SI-3. Linear correlations of the Stokes' shift  $\nu_{\text{abs}} - \nu_{\text{flu}}$  (in  $1000 \text{ cm}^{-1}$ ) of **3c** versus  $f_{\text{BK}}$  to obtain  $m_1$  and of the sum  $\nu_{\text{abs}} + \nu_{\text{flu}}$  versus  $f_{\text{BK}} + 2g_{\text{BK}}$  to obtain  $m_2$ .

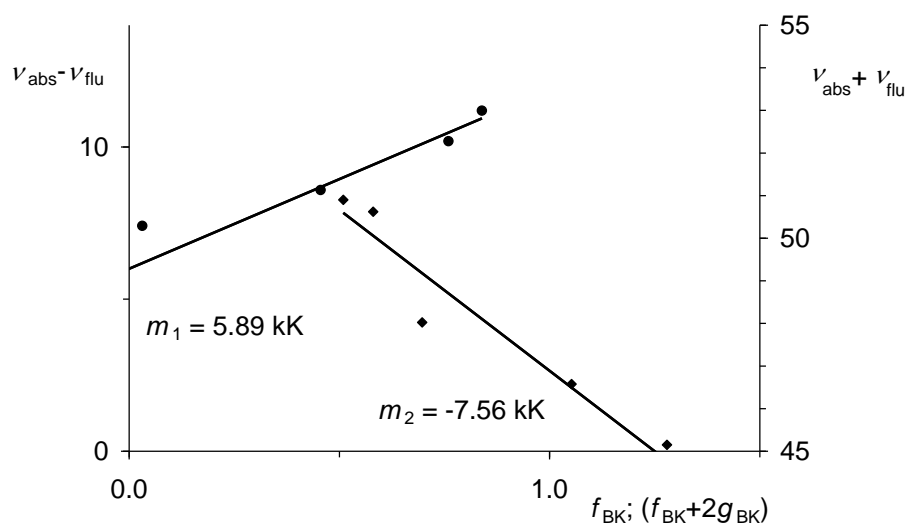

Fig. SI-4. Linear correlations of the Stokes' shift  $\nu_{\text{abs}} - \nu_{\text{flu}}$  (in  $1000 \text{ cm}^{-1}$ ) of **3d** versus  $f_{\text{BK}}$  to obtain  $m_1$  and of the sum  $\nu_{\text{abs}} + \nu_{\text{flu}}$  versus  $f_{\text{BK}} + 2g_{\text{BK}}$  to obtain  $m_2$ .

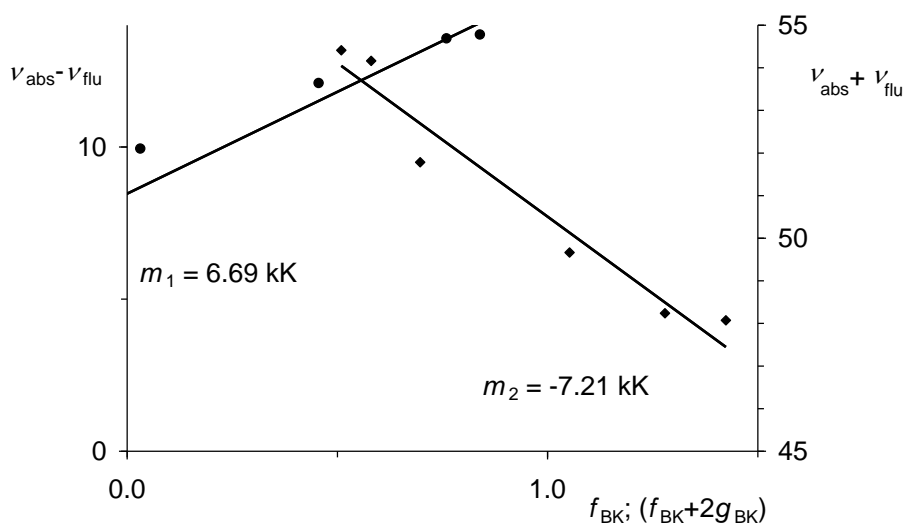

Fig. SI-5. Linear correlations of the Stokes' shift  $\nu_{\text{abs}} - \nu_{\text{flu}}$  (in  $1000 \text{ cm}^{-1}$ ) of **3g** versus  $f_{\text{BK}}$  to obtain  $m_1$  and of the sum  $\nu_{\text{abs}} + \nu_{\text{flu}}$  versus  $f_{\text{BK}} + 2g_{\text{BK}}$  to obtain  $m_2$ .

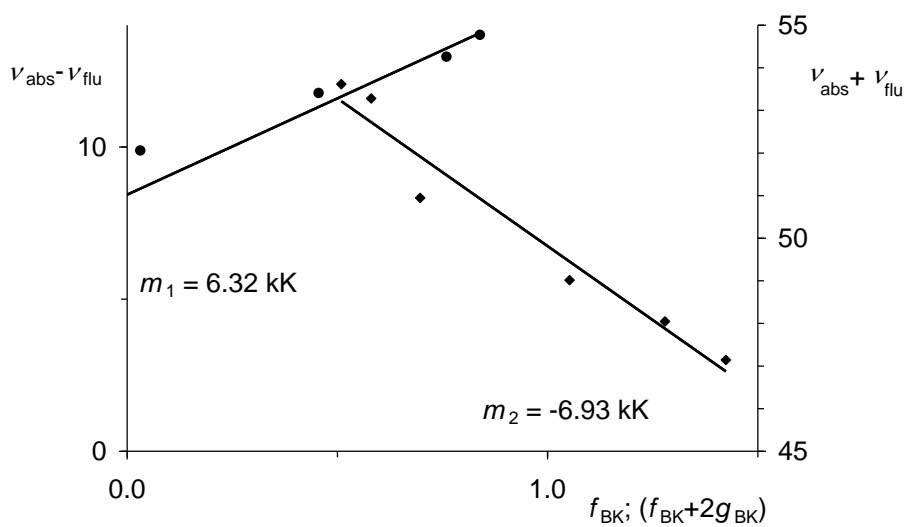

Fig. SI-6. Linear correlations of the Stokes' shift  $\nu_{\text{abs}} - \nu_{\text{flu}}$  (in  $1000 \text{ cm}^{-1}$ ) of **3h** versus  $f_{\text{BK}}$  to obtain  $m_1$  and of the sum  $\nu_{\text{abs}} + \nu_{\text{flu}}$  versus  $f_{\text{BK}} + 2g_{\text{BK}}$  to obtain  $m_2$ .



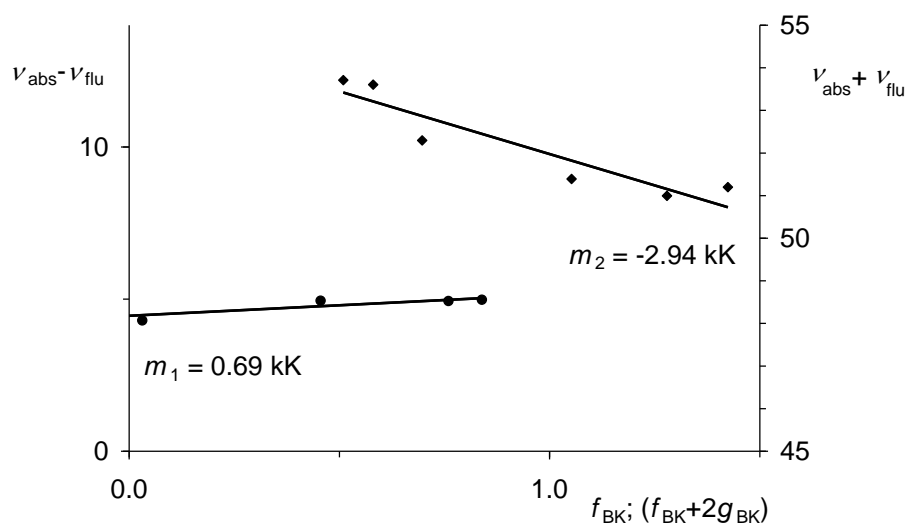

Fig. SI-7. Linear correlations of the Stokes' shift  $\nu_{\text{abs}} - \nu_{\text{flu}}$  (in  $1000 \text{ cm}^{-1}$ ) of **3i** versus  $f_{\text{BK}}$  to obtain  $m_1$  and of the sum  $\nu_{\text{abs}} + \nu_{\text{flu}}$  versus  $f_{\text{BK}} + 2g_{\text{BK}}$  to obtain  $m_2$ .

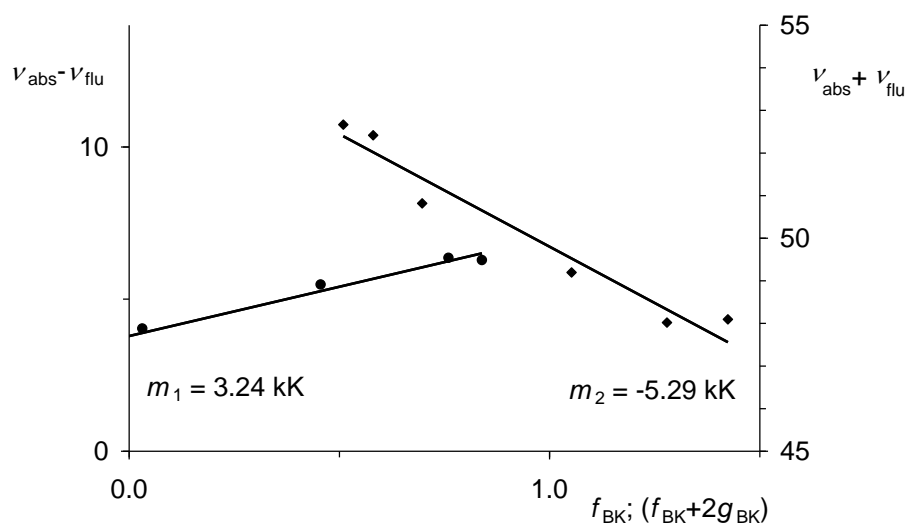

Fig. SI-8. Linear correlations of the Stokes' shift  $\nu_{\text{abs}} - \nu_{\text{flu}}$  (in  $1000 \text{ cm}^{-1}$ ) of **3j** versus  $f_{\text{BK}}$  to obtain  $m_1$  and of the sum  $\nu_{\text{abs}} + \nu_{\text{flu}}$  versus  $f_{\text{BK}} + 2g_{\text{BK}}$  to obtain  $m_2$ .

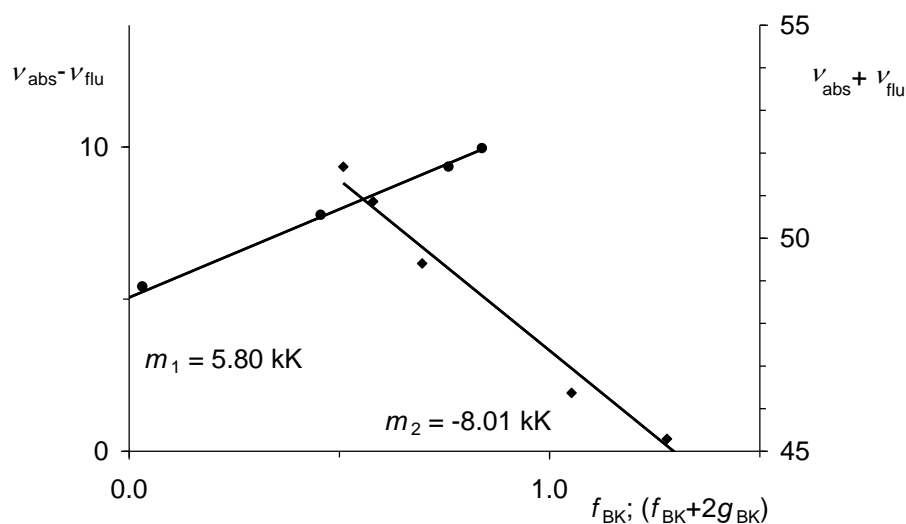

Fig. SI-9. Linear correlations of the Stokes' shift  $\nu_{\text{abs}} - \nu_{\text{flu}}$  (in  $1000 \text{ cm}^{-1}$ ) of **3l** versus  $f_{\text{BK}}$  to obtain  $m_1$  and of the sum  $\nu_{\text{abs}} + \nu_{\text{flu}}$  versus  $f_{\text{BK}} + 2g_{\text{BK}}$  to obtain  $m_2$ .

#### 4.2. Analysis of solvatochromism of compounds **3** by means of the multi parameter approach of Kamlet, Taft and Abboud

The solvatochromism of the series of **3** was analysed by means of the multi parameter approach of equation (1) developed by Kamlet, Taft and Abboud<sup>13,SI-5</sup> where solvent effects were generalized to any solvent-dependent property  $XYZ$ . The sensitivity to dipolar-polarizability term is characterized by  $s$  where a correction  $d$  concerns the polarizability. The parameters  $a$  and  $b$  are attributed to hydrogen acceptor and donor properties. We applied equation (SI-4) to the  $E_{\text{T}}$  values of the fluorescence ( $E_{\text{T}} = 28591 \text{ kcal}\cdot\text{nm}/\lambda_{\text{max}}$ ) of the series of **3**, obtained equation (SI-5) and optimized the parameters of equation (SI-5) by least square-fitting. The results are reported in Table SI-2 where the values  $s$  indicates a generally pronounced sensitivity of **3** to solvent effects. Large  $s$ -values were found for the favoured **3g**, but also for **3d**, **3h** and **3l**. A minor variation is found for the parameter  $d$  except for the dimethylaminophenyl derivative **3c**. A high value of  $a$  is found for the latter as one may expect for acceptors of hydrogen bonds. There are only minor variations for the other values of  $a$  and  $b$  in accordance with the lack of pronounced effects of hydrogen bonds.

$$XYZ = XYZ_0 + s (\pi^* + d\delta) + a\alpha + b\beta \quad (\text{SI-4})$$

$$E_T = XYZ_0 + s (\pi^* + d\delta) + a\alpha + b\beta \quad (\text{SI-5})$$

Table SI-2. Calculated parameters  $XYZ_0$ ,  $s$ ,  $d$ ,  $a$  and  $b$  by means of least square fits of the experimental  $E_T$  values of fluorescence of **3** according to equation (SI-5). Solvents: 1-Butanol, *N,N*-dimethylformamide, chloroform, toluene, *n*-hexane.

| Nr.       | $XYZ_0$ | $s$    | $d$   | $a$    | $b$   |
|-----------|---------|--------|-------|--------|-------|
| <b>3a</b> | 70.71   | -3.64  | -0.27 | -2.30  | -0.83 |
| <b>3b</b> | 66.85   | -7.32  | -0.28 | -3.25  | -4.20 |
| <b>3c</b> | 61.29   | -6.29  | 0.60  | -14.37 | -3.80 |
| <b>3d</b> | 63.62   | -16.68 | -0.23 | -3.26  | -3.95 |
| <b>3g</b> | 65.80   | -14.22 | -0.17 | -6.00  | -6.02 |
| <b>3h</b> | 64.48   | -15.94 | -0.20 | -4.92  | -3.80 |
| <b>3i</b> | 70.00   | -3.75  | -0.20 | -2.24  | -0.91 |
| <b>3j</b> | 69.51   | -8.41  | -0.27 | -4.25  | -3.38 |
| <b>3l</b> | 65.77   | -15.18 | -0.39 | -4.12  | -4.94 |

#### 4.3. Analysis of solvatochromism of compounds **3** by means of the multi parameter approach of Catalán

The multi parameter approach of equation (SI-6) of Catalán<sup>14,SI-6</sup> with the generalized solvent effect  $A$  was applied to the  $E_T$ -values ( $E_T=28591 \text{ kcal}\cdot\text{nm}/\lambda_{\text{max}}$ ) of the solvatochromism of fluorescence to obtain equation (SI-7).

$$A = A_0 + bSA + cSB + dSP + eSdP \quad (\text{SI-6})$$

$$E_T = A_0 + bSA + cSB + dSP + eSdP \quad (\text{SI-7})$$

We applied equation (SI-7) to the fluorescence of the series of **3** and optimized the parameters  $A_0$ ,  $b$ ,  $c$ ,  $d$  and  $e$  by means of least square fitting; see Table 1.

Table SI-3. Optimized parameters  $A_0$ ,  $b$ ,  $c$ ,  $d$  and  $e$  of equation (SI-7) by means of least square fitting of the experimental  $E_T$ -values of the fluorescence of **3** in the solvents 1-butanol, 1-undecanol, *N,N*-dimethylformamide, chloroform, toluene, *n*-hexane, *n*-tetradecane. (*N,N*-Dimethylformamide was excluded for **3c** because of lack of fluorescence).  $r$ : Correlation number.

| Nr.       | $A_0$ | $b$    | $c$    | $d$    | $e$    | $r$    |
|-----------|-------|--------|--------|--------|--------|--------|
| <b>3a</b> | 72.6  | -5.53  | -0.10  | -2.46  | -3.72  | 0.9987 |
| <b>3b</b> | 68.7  | -6.02  | -3.62  | -2.07  | -7.36  | 0.9991 |
| <b>3c</b> | 72.6  | 16.33  | -13.69 | -12.67 | -17.60 | 1.0000 |
| <b>3d</b> | 71.6  | -2.02  | -4.99  | -10.11 | -14.93 | 0.9984 |
| <b>3g</b> | 77.3  | -12.74 | -4.77  | -16.11 | -12.93 | 0.9989 |
| <b>3h</b> | 77.4  | -7.30  | -5.19  | -18.05 | -12.80 | 0.9995 |
| <b>3i</b> | 74.5  | -5.10  | -1.07  | -6.41  | -2.87  | 0.9953 |
| <b>3j</b> | 72.9  | -8.83  | -2.43  | -4.37  | -8.22  | 0.9998 |
| <b>3l</b> | 66.1  | -1.74  | -7.49  | 1.15   | -13.48 | 0.9966 |

The parameter  $e$  can be applied as a measure of the sensitivity concerning the dipolarity of the solvent SdP where high negative valued were found for the donor- substituted derivatives **3c**, **3d**, **3g**, **3h** and **3l**. The effect of a simple 4-methoxyphenyl group in **3b** is appreciably smaller. The parameter  $d$  for the solvent polarizability SP is found to be strongly negative for **3c**, **3d**, **3g** and **3h** indicating a boosting solvent effect of dipolarity and polarizability for these compounds. The parameters  $b$  and  $c$  concerning solvent acidity SA and solvent basicity SB are not pronounced except of  $b$  for **3c** because of the hydrogen-bonding ability of the dimethylamino group. The  $b$ -value for **3g** is remarkably strong negative indicating a further co-operative solvent effect. As a consequence, compound **3g** can be estimated to be a good compromise concerning solvent effects.

## 5. NMR-spectra

### 6-Phenyl-2-(tridecan-7-yl)-1H-benzo[de]isoquinoline-1,3(2H)-dione (3a)

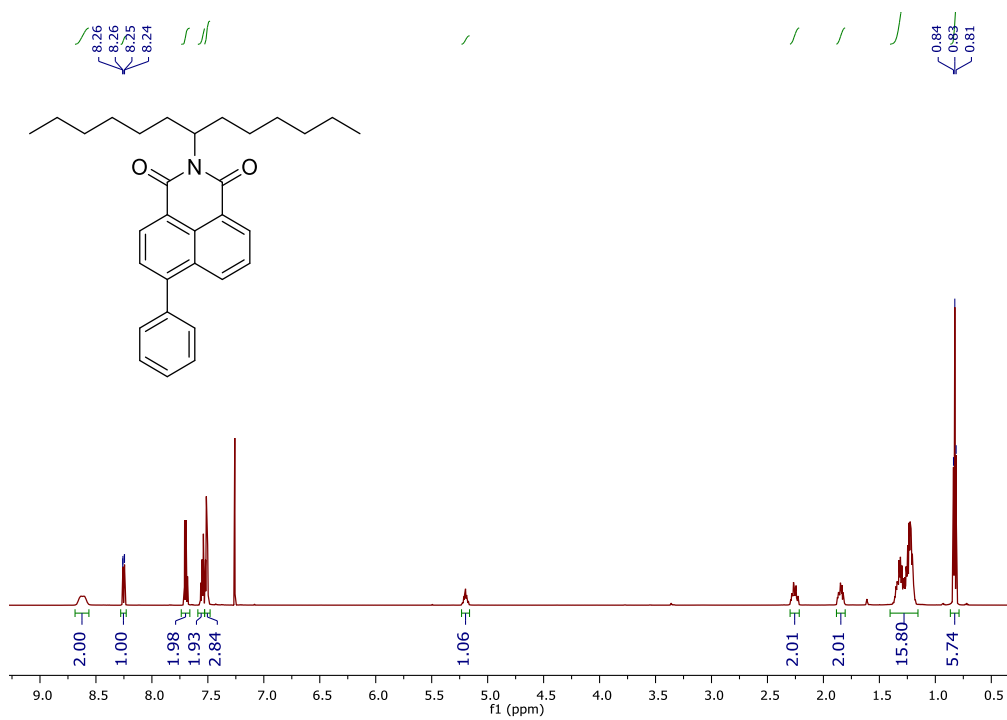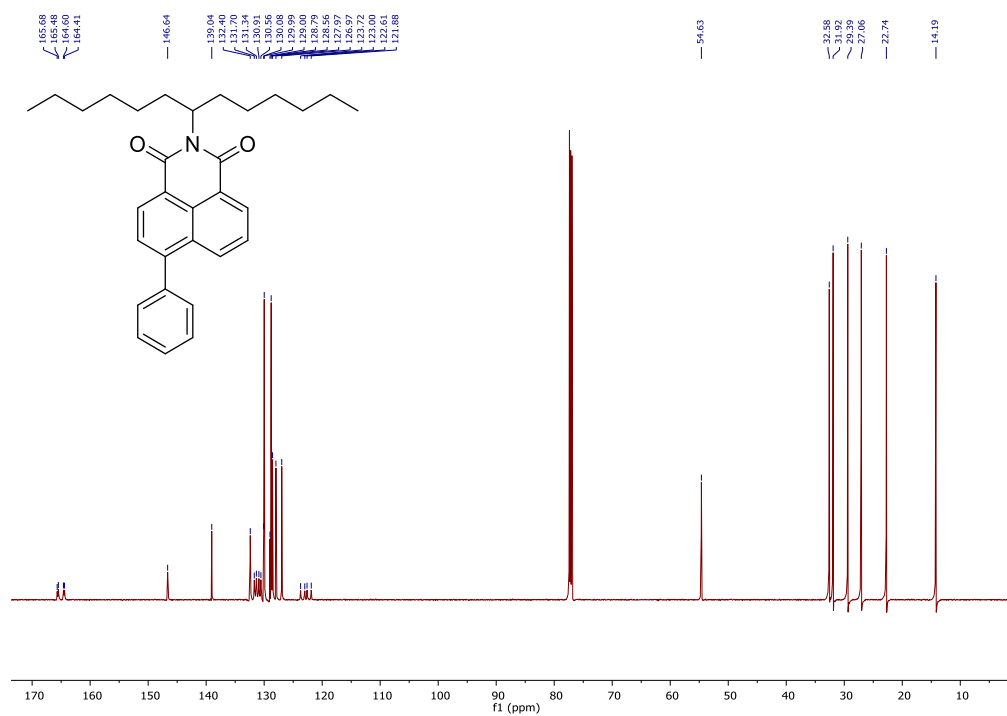

# 6-(4-Methoxyphenyl)-2-(tridecan-7-yl)-1H-benzo[de]isoquinoline-1,3(2H)-dione (3b)

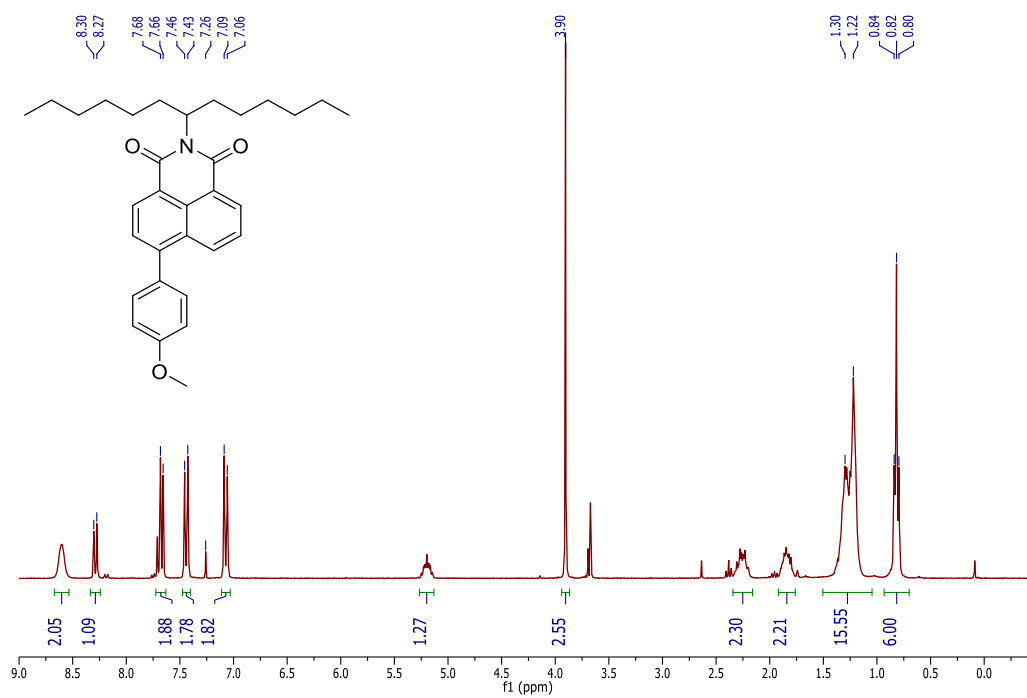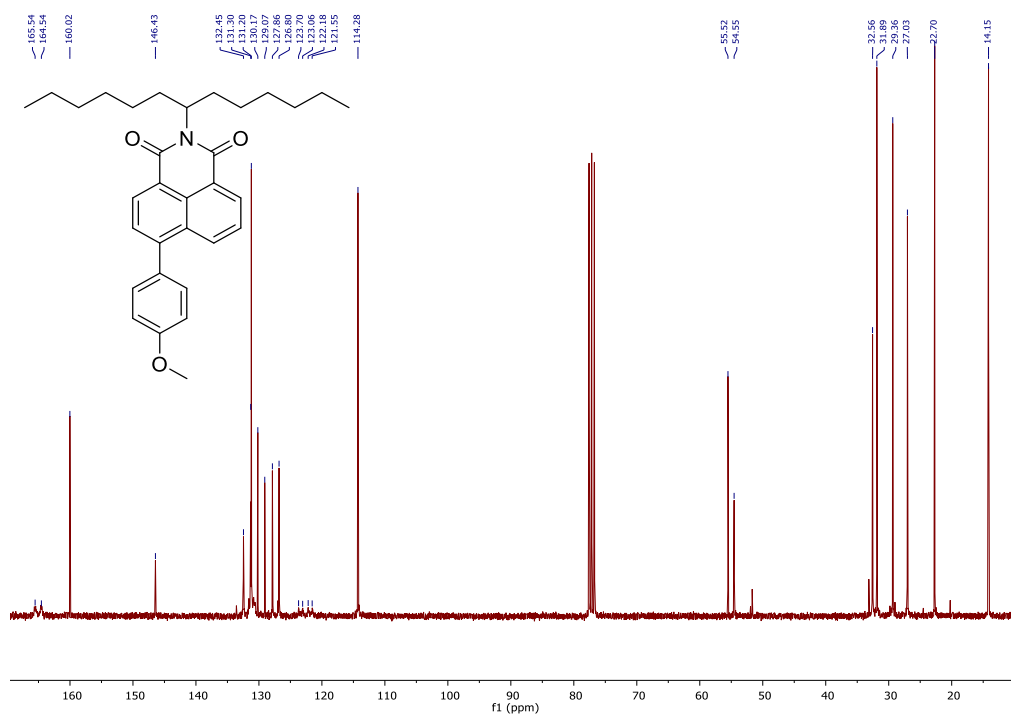

# 6-(4-(Dimethylamino)phenyl)-2-(tridecan-7-yl)-1H-benzo[de]isoquinoline-1,3(2H)-dione

(3c)

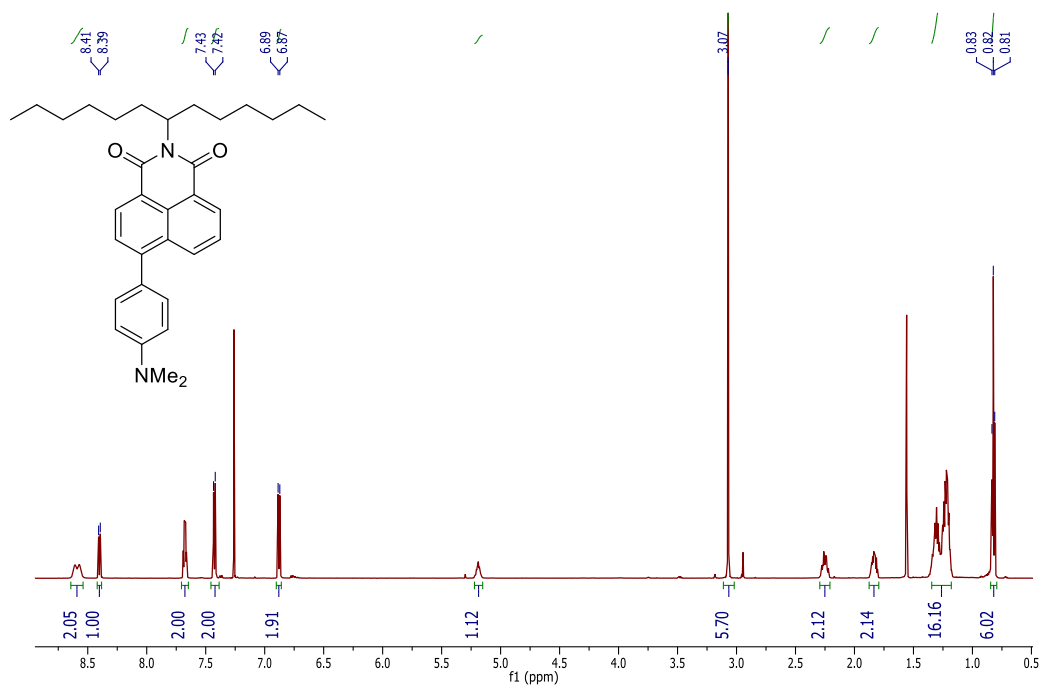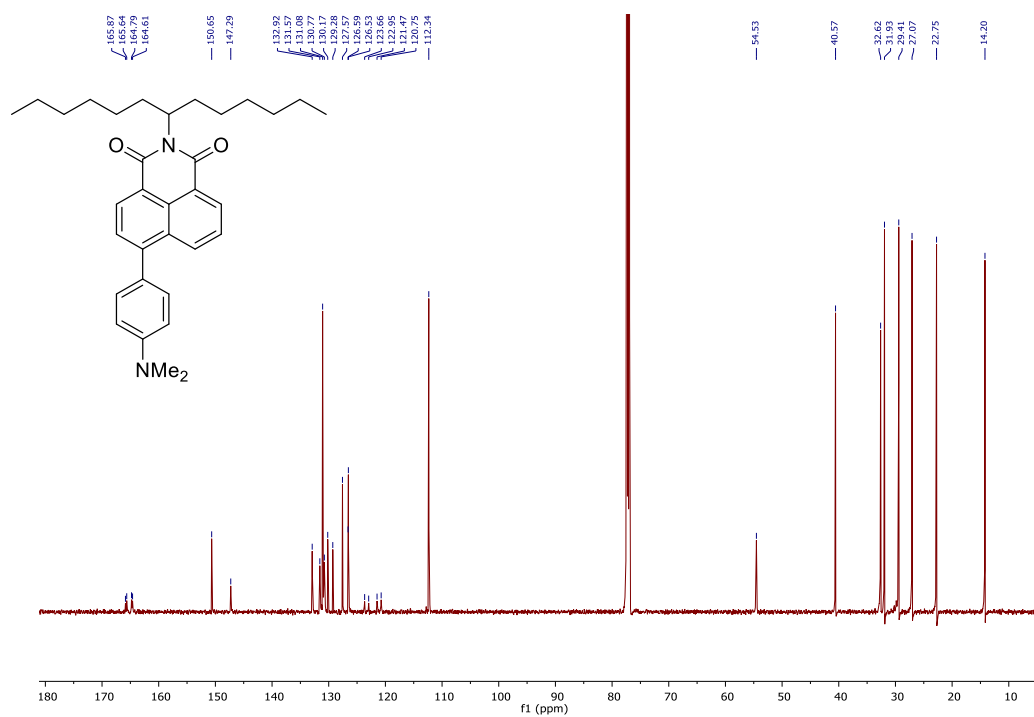

6-(3,4,5-Trimethoxyphenyl)-2-(tridecan-7-yl)-1H-benzo[de]isoquinoline-1,3(2H)-dione (3d)

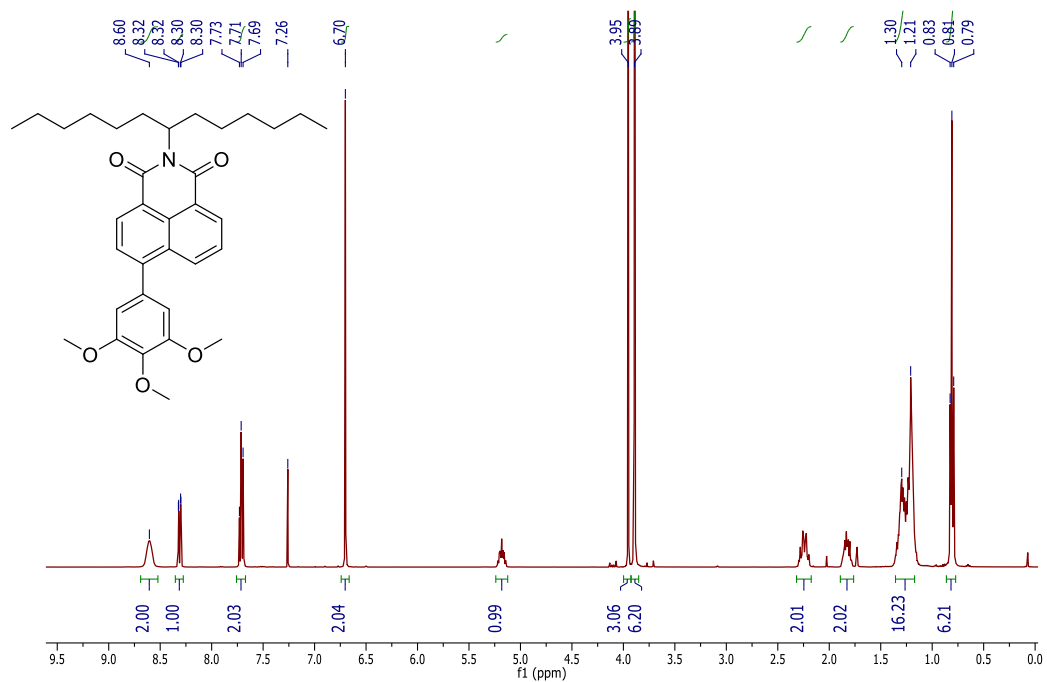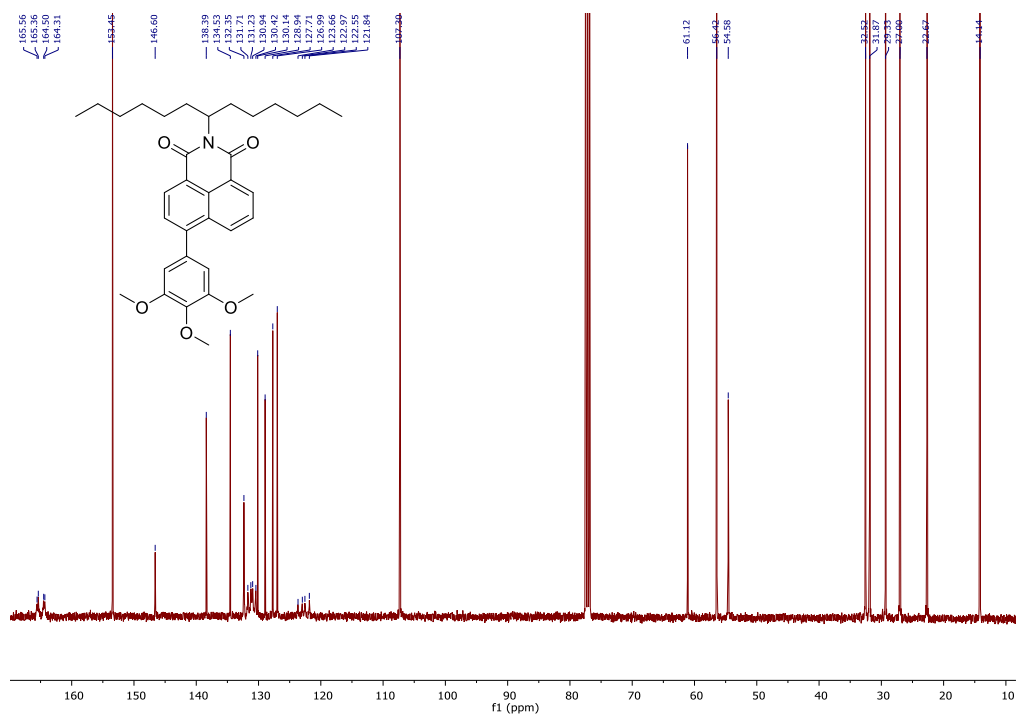



**6-(2,6-Dibromo-3,4,5-trimethoxyphenyl)-2-(tridecan-7-yl)-1H-benzo[de]isoquinoline-1,3(2H)-dione (3e)**

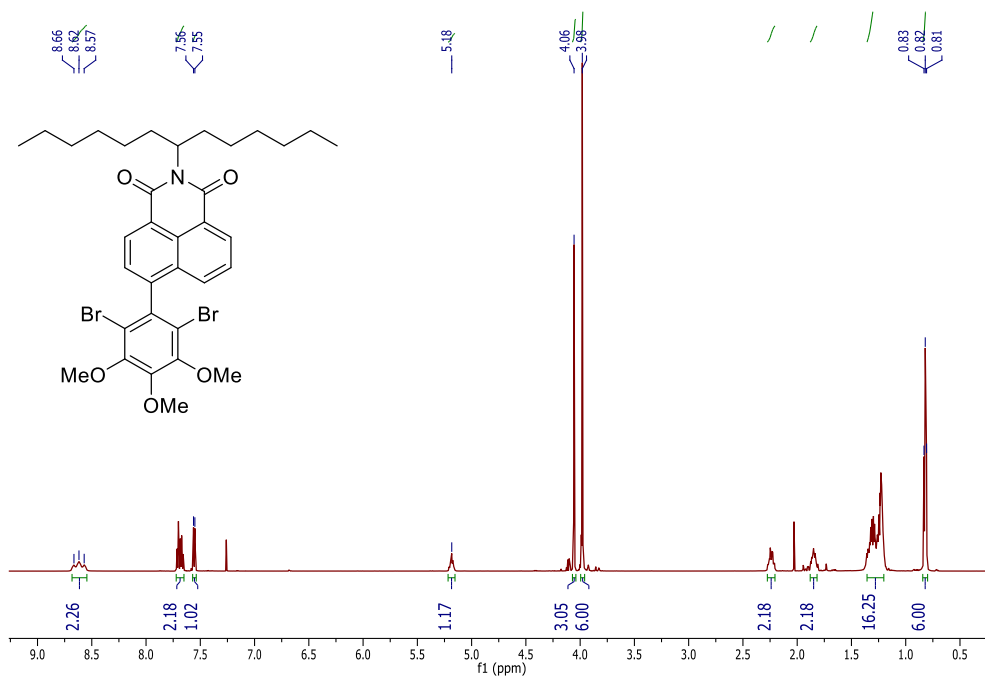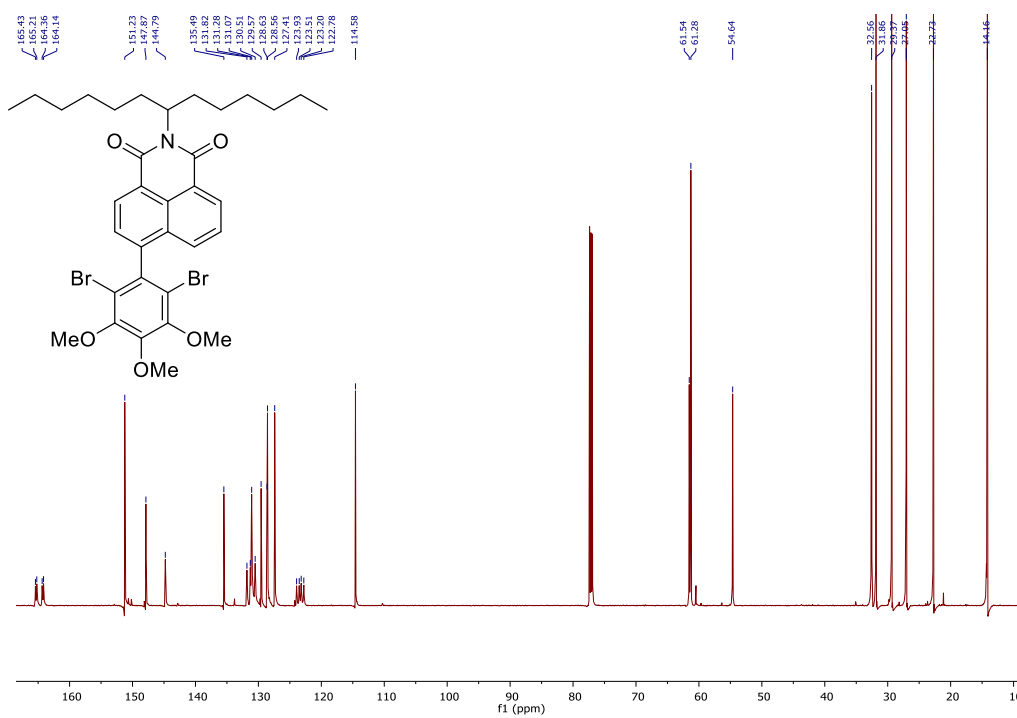

**6-(3,4,5-Trimethoxy-2,6-dimethylphenyl)-2-(tridecan-7-yl)-1H-benzo[de]isoquinoline-1,3(2H)-dione (3f)**

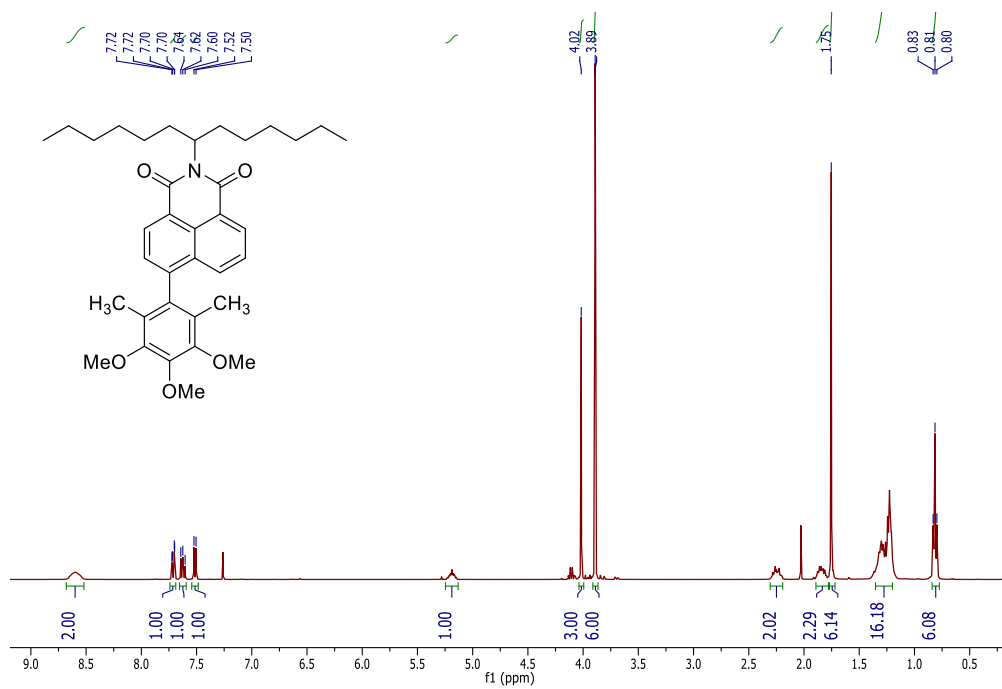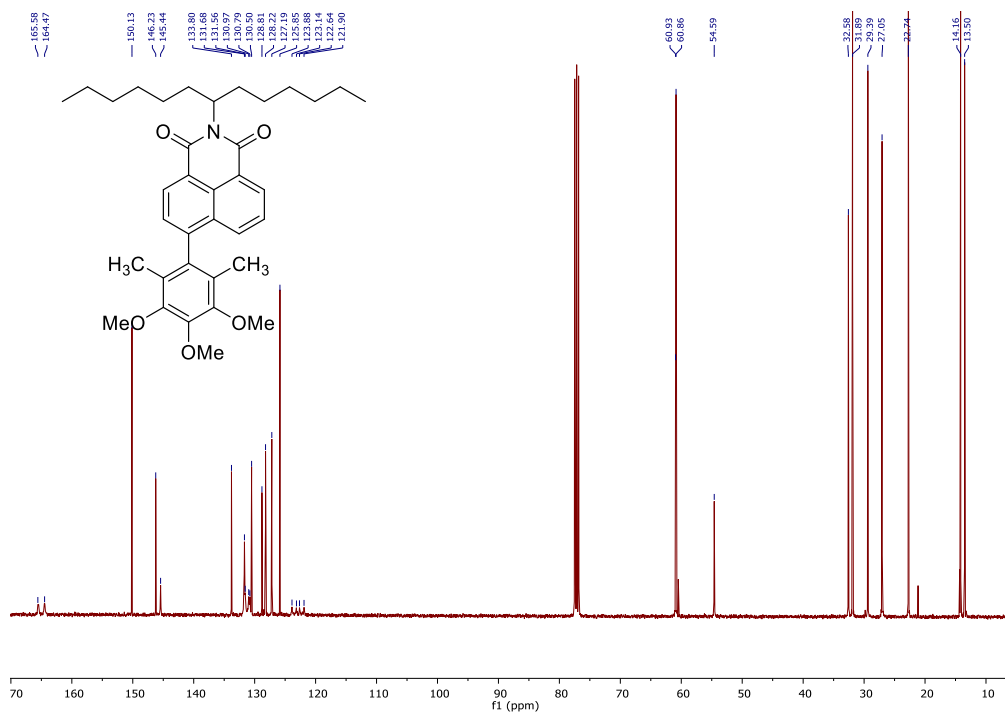

6-(4-Methoxynaphthalen-1-yl)-2-(tridecan-7-yl)-1*H*-benzo[*de*]isoquinoline-1,3(2*H*)-dione  
(3g)

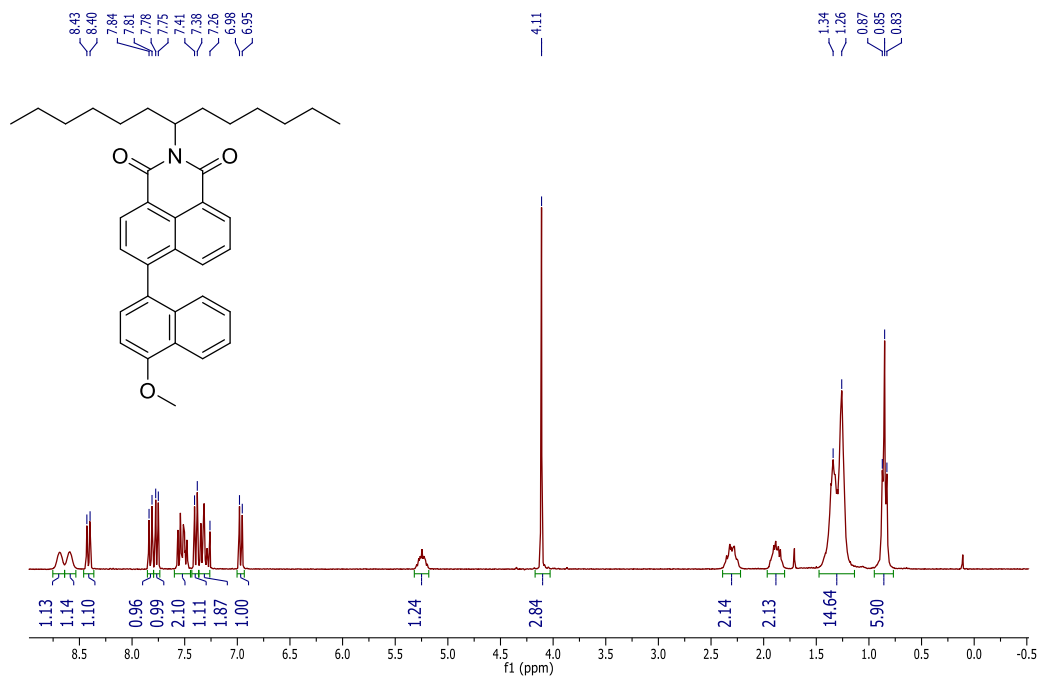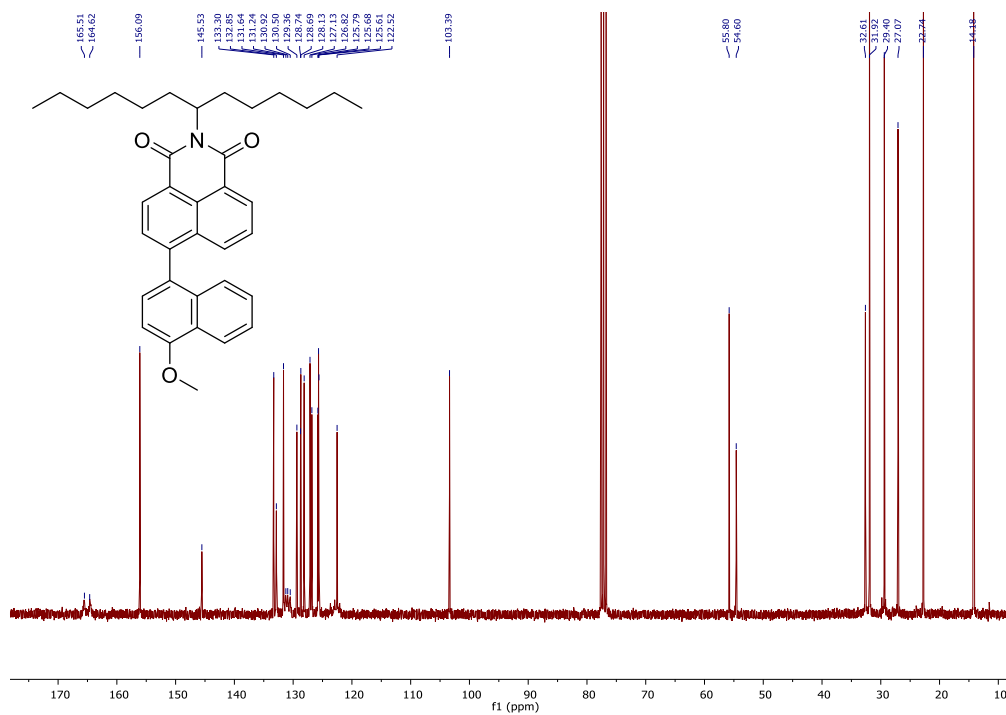

**6-(4-Methoxy-8-methylnaphthalen-1-yl)-2-(tridecan-7-yl)-1H-benzo[de]isoquinoline-1,3(2H)-dione (3h)**

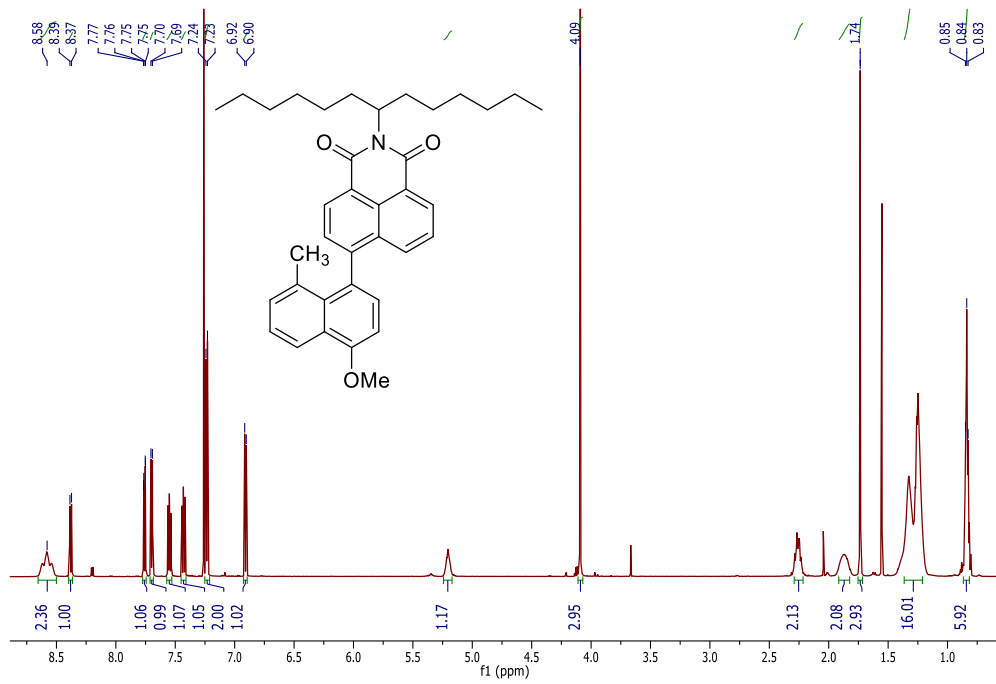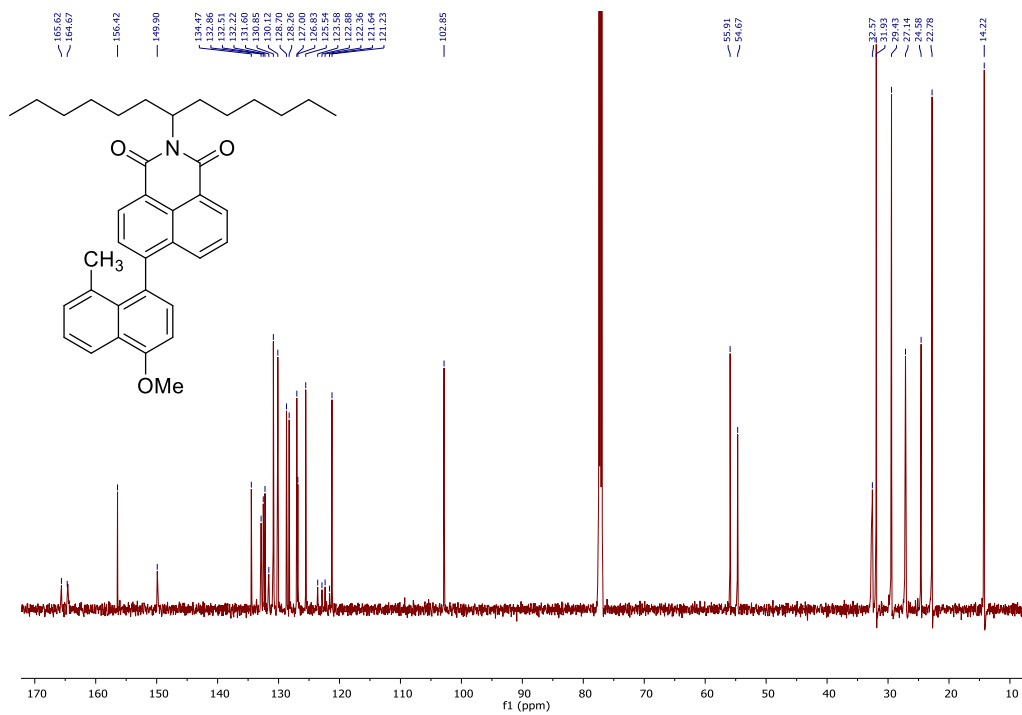

6-(4-(Trimethylsilyl)phenyl)-2-(tridecan-7-yl)-1H-benzo[de]isoquinoline-1,3(2H)-dione (3i)

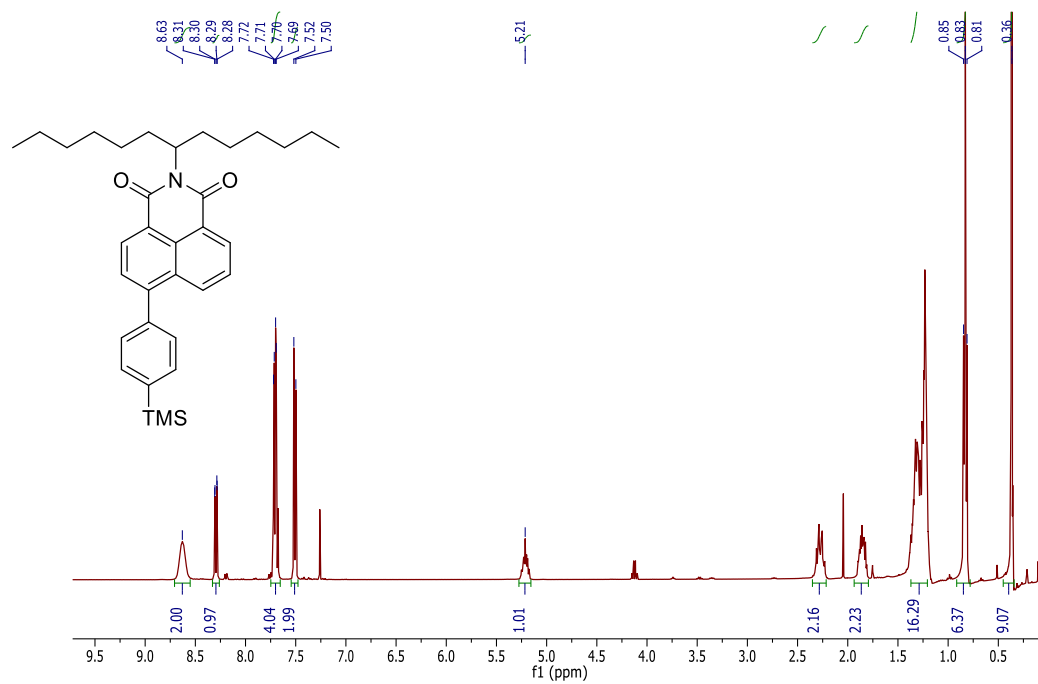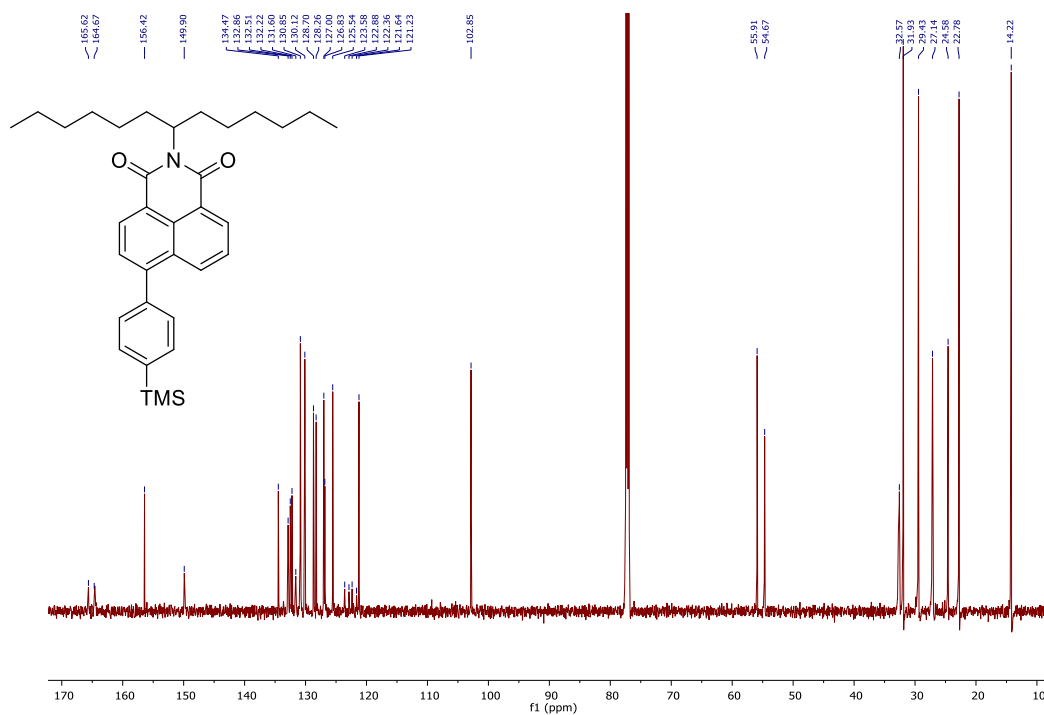

6-(4-Cyanophenyl)-2-(tridecan-7-yl)-1-benzo[de]isoquinoline-1,3(2H)-dione (3j)

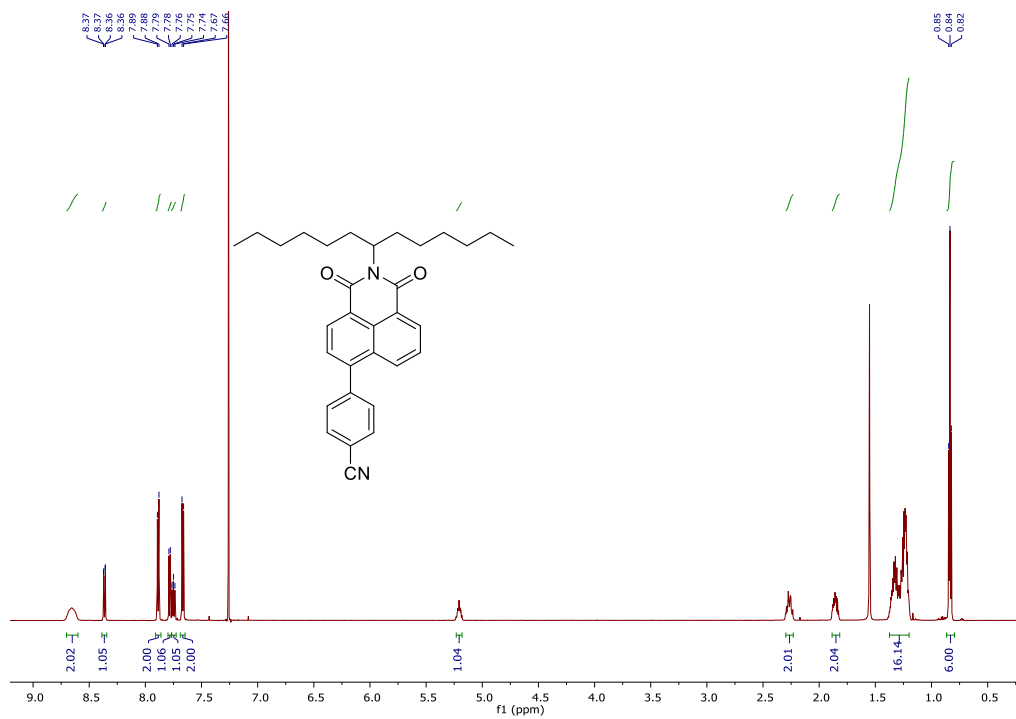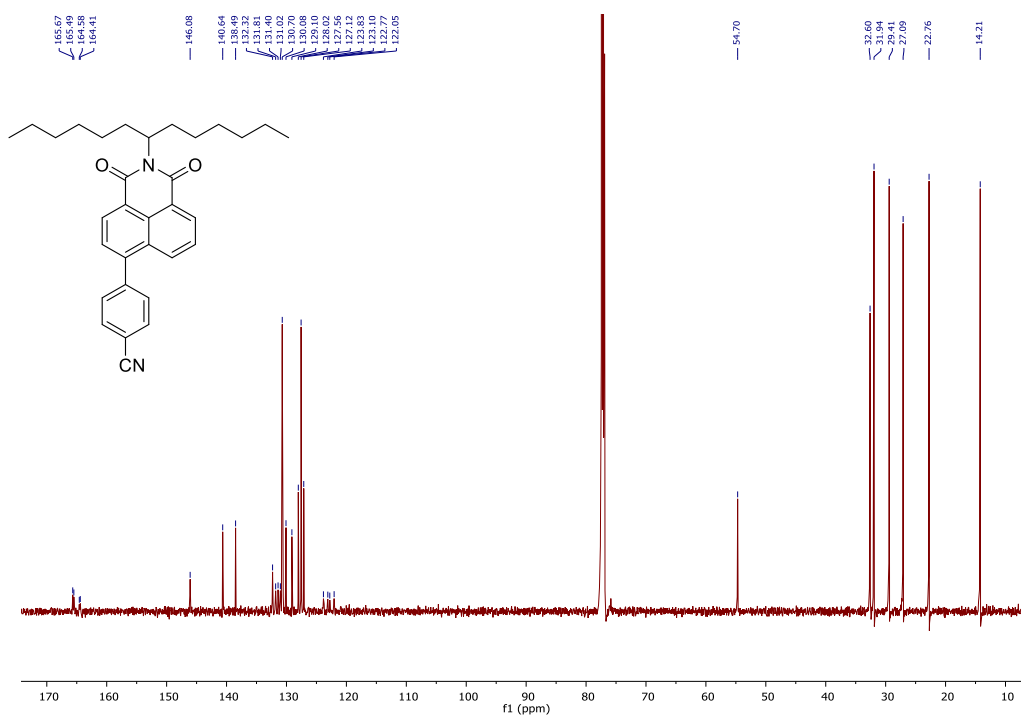

6-(4-Iodophenyl)-2-(tridecan-7-yl)-1H-benzo[de]isoquinoline-1,3(2H)-dione (3k)

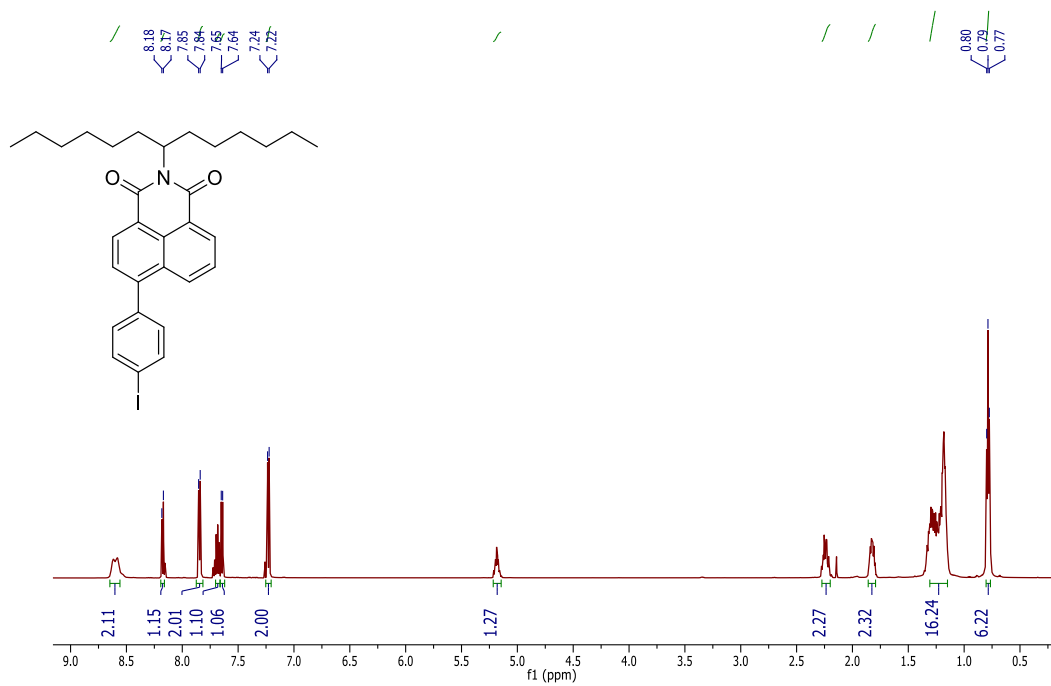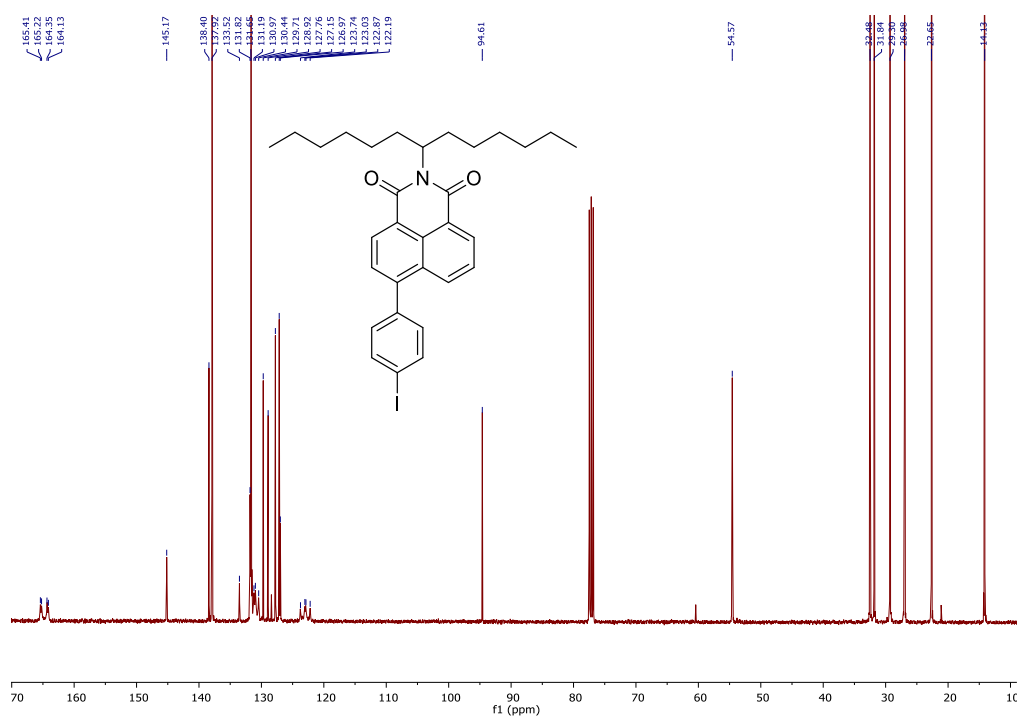

**6-(4'-Methoxy-[1,1'-biphenyl]-4-yl)-2-(tridecan-7-yl)-1*H*-benzo[*de*]isoquinoline-1,3(2*H*)-dione (3I)**

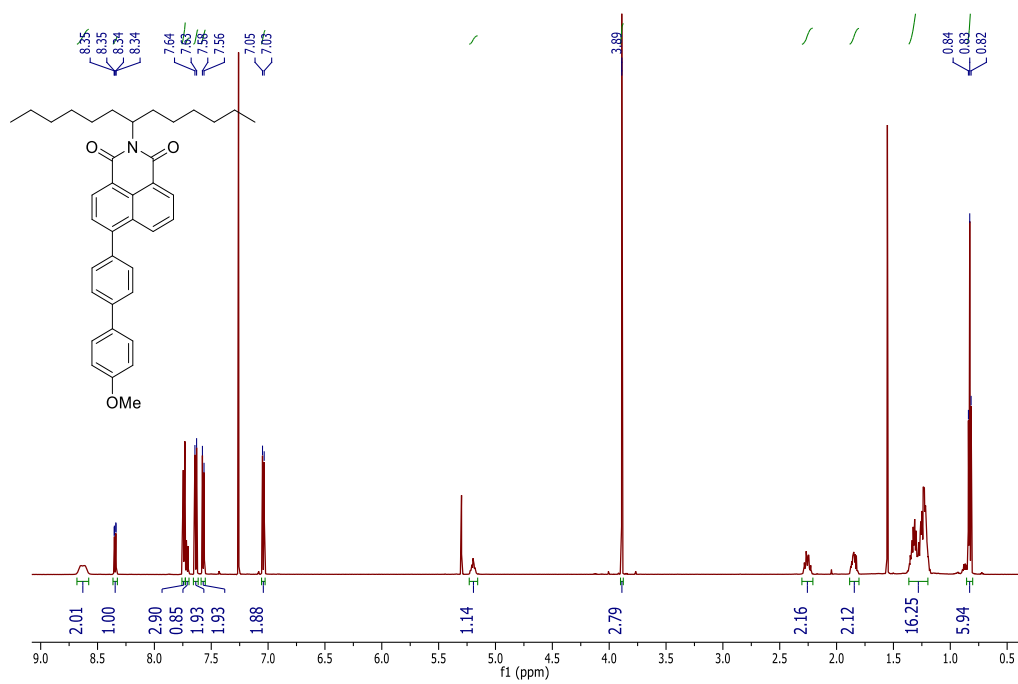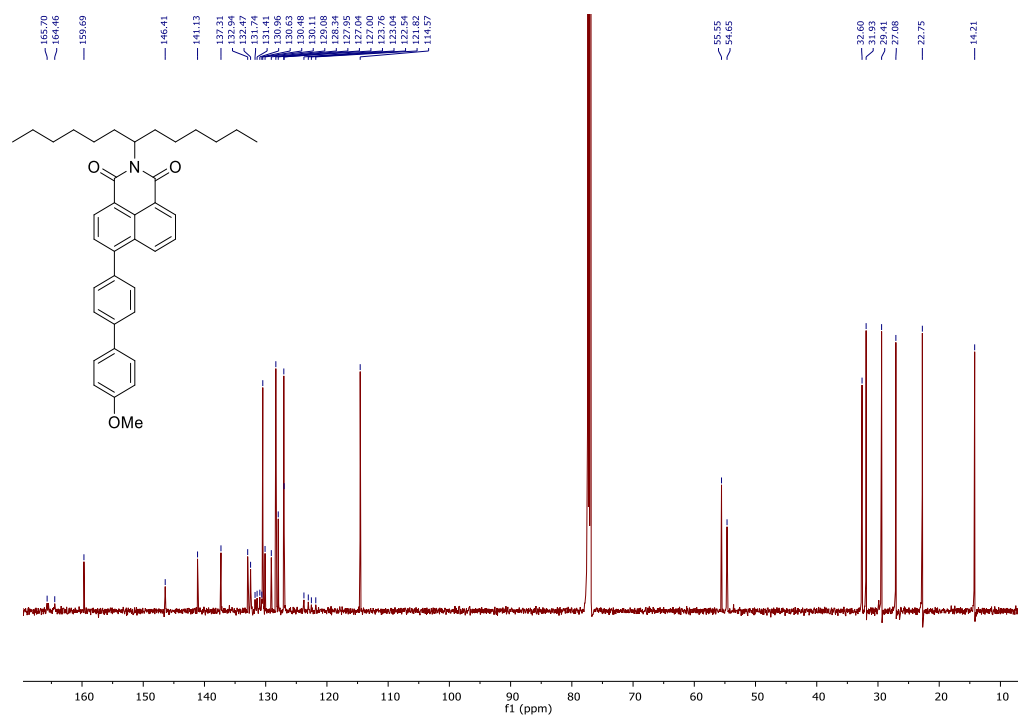



## 6. IR-spectra

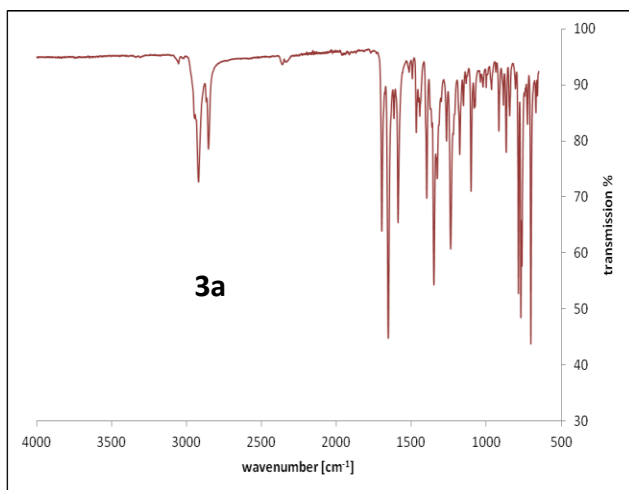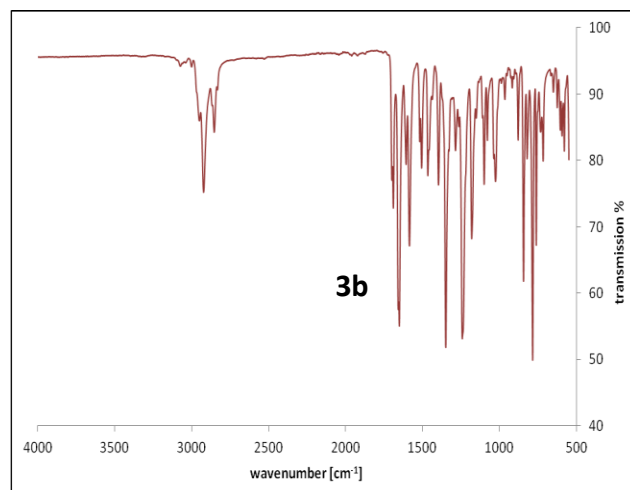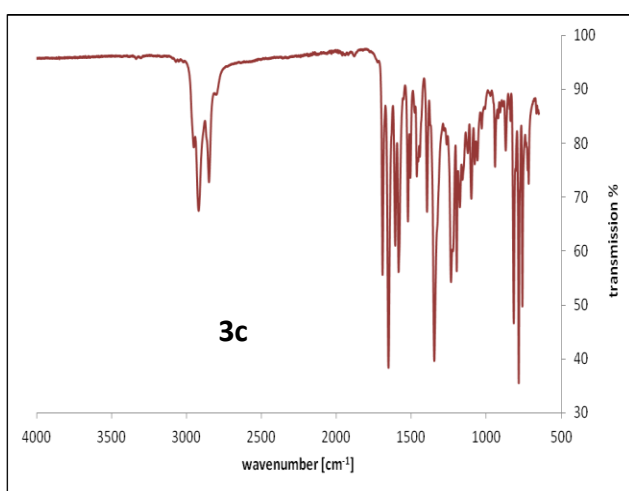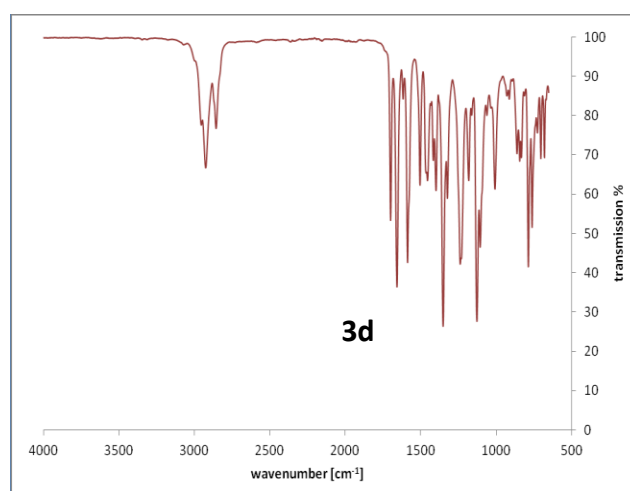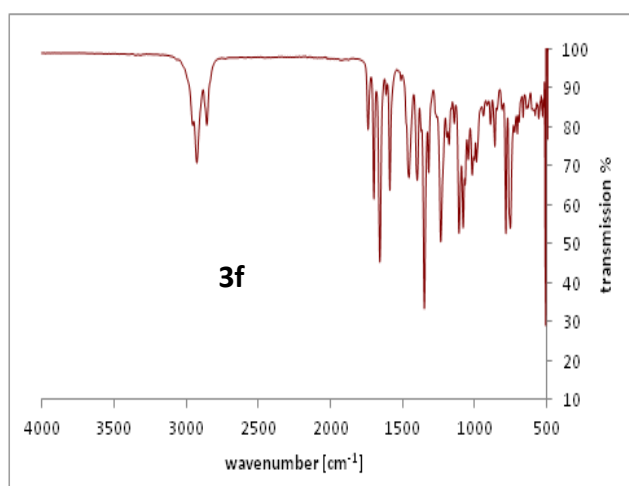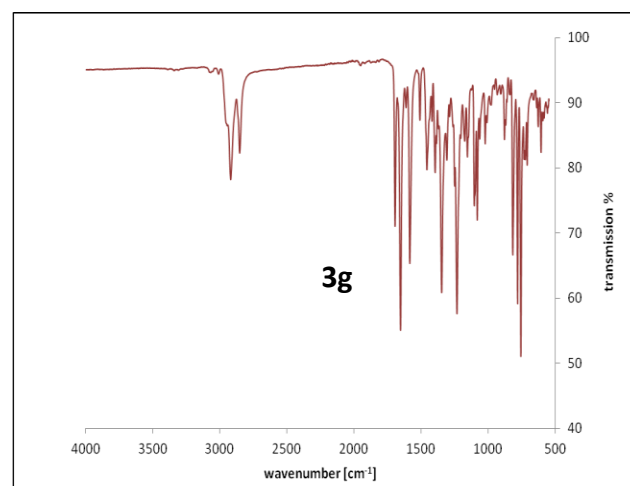

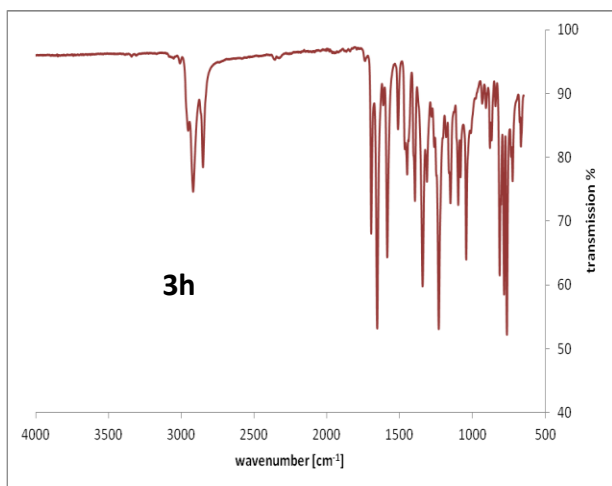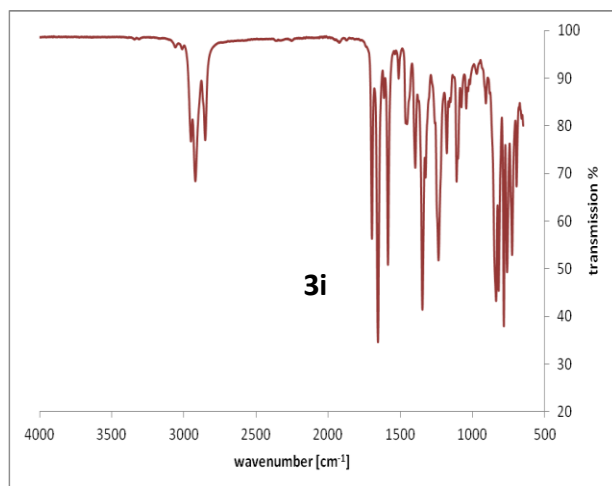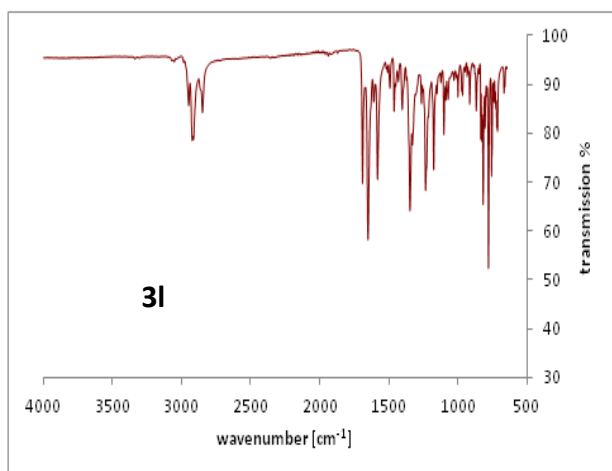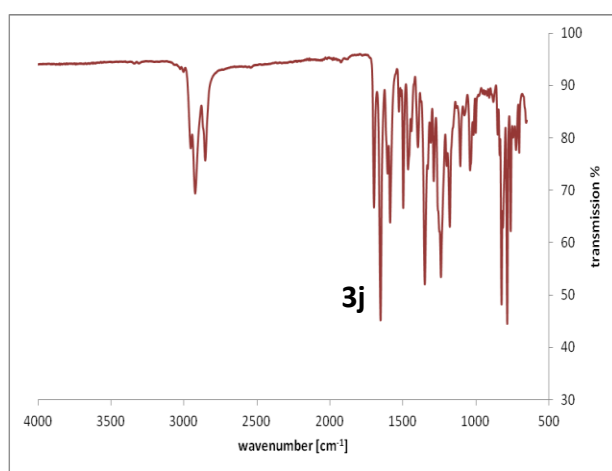

## 7.1. Additional optical spectroscopy data

Table SI-4. Overview of the spectroscopic data.

|                                    | CHCl <sub>3</sub> | Tetradecane | <i>n</i> -Hexane | 1-Butanol | 1-Undecanol | DMF    | Toluene |
|------------------------------------|-------------------|-------------|------------------|-----------|-------------|--------|---------|
| <b>3a</b>                          |                   |             |                  |           |             |        |         |
| $\lambda_{\text{Abs}}^{\text{a}}$  | 355.4             | 343.4       | 342.2            | 355.2     | 353.4       | 355.2  | 346.8   |
| $\lambda_{\text{Fluo}}^{\text{b}}$ | 420.0             | 402.3       | 402.7            | 429.1     | 420.6       | 427.2  | 410.6   |
| $e^{\text{c}}$                     | 17100             | 17600       | 16800            | 19000     | 18500       | 17700  | 16900   |
| $\Phi^{\text{d}}$                  | 0.78              | 0.094       | 0.076            | 0.95      | 0.76        | 0.74   | 0.50    |
| $\tau^{\text{e}}$                  | 3.21              |             |                  | 3.85      |             | 3.62   |         |
| <b>3b</b>                          |                   |             |                  |           |             |        |         |
| $\lambda_{\text{Abs}}^{\text{a}}$  | 364.8             | 356.4       | 354.2            | 366.2     | 365.6       | 368.0  | 364.2   |
| $\lambda_{\text{Fluo}}^{\text{b}}$ | 459.6             | 427.8       | 424.0            | 498.1     | 476.4       | 497.2  | 443.2   |
| $e^{\text{c}}$                     | 16900             | 15800       | 15700            | 17100     | 16700       | 16400  | 16400   |
| $\Phi^{\text{d}}$                  | 0.83              | 0.79        | 0.65             | 0.83      | 0.83        | 0.82   | 0.75    |
| $\tau^{\text{e}}$                  | 4.11              | 3.12        | 2.65             | 5.18      | 4.78        | 5.24   | 3.50    |
| <b>3c</b>                          |                   |             |                  |           |             |        |         |
| $\lambda_{\text{Abs}}^{\text{a}}$  | 426.2             | 403.8       | 401.2            | 430.2     | 428.6       | 433.8  | 418.2   |
| $\lambda_{\text{Fluo}}^{\text{b}}$ | 578.4             | 469.8       | 462.7            | 638.4     | 610.0       |        | 532.4   |
| $e^{\text{c}}$                     | 11200             | 16500       | 12300            | 10300     | 11800       | 10700  | 10800   |
| $\Phi^{\text{d}}$                  | 0.64              | 0.73        | 0.70             | 0.013     | 0.14        | 0.0037 | 0.65    |
| $\tau^{\text{e}}$                  | 6.99              | 3.61        | 3.47             | 3.50      | 5.51        |        | 5.12    |
| <b>3d</b>                          |                   |             |                  |           |             |        |         |
| $\lambda_{\text{Abs}}^{\text{a}}$  | 362.2             | 357.0       | 354.8            | 361.4     | 362.6       | 365.6  | 360.8   |
| $\lambda_{\text{Fluo}}^{\text{b}}$ | 525.1             | 442.3       | 440.2            | 572.1     | 526.4       | 618.8  | 492.4   |
| $e^{\text{c}}$                     | 15900             | 17100       | 16500            | 16600     | 16900       | 16500  | 17000   |
| $\Phi^{\text{d}}$                  | 0.65              | 0.51        | 0.41             | 0.022     | 0.26        | 0.0065 | 0.71    |
| $\tau^{\text{e}}$                  | 6.62              | 2.78        | 2.03             | 0.208     | 1.75        | 0.119  | 5.40    |
| <b>3g</b>                          |                   |             |                  |           |             |        |         |
| $\lambda_{\text{Abs}}^{\text{a}}$  | 325.0             | 322.6       | 322.6            | 323.6     | 323.8       | 323.8  | 324.0   |
| $\lambda_{\text{Fluo}}^{\text{b}}$ | 509.7             | 431.7       | 427.1            | 576.8     | 532.4       | 581.8  | 478.0   |
| $e^{\text{c}}$                     | 15300             | 16200       | 14900            | 16200     | 18800       | 15200  | 16000   |
| $\Phi^{\text{d}}$                  | 0.39              | 0.34        | 0.33             | 0.088     | 0.23        | 0.13   | 0.18    |
| $\tau^{\text{e}}$                  | 4.07              | 1.83        | 1.70             | 1.80      | 4.85        | 3.85   | 1.53    |
| <b>3h</b>                          |                   |             |                  |           |             |        |         |
| $\lambda_{\text{Abs}}^{\text{a}}$  | 329.0             | 327.2       | 326.6            | 327.8     | 329.0       | 328.8  | 328.8   |
| $\lambda_{\text{Fluo}}^{\text{b}}$ | 522.7             | 440.2       | 434.8            | 570.1     | 537.0       | 597.8  | 487.0   |
| $e^{\text{c}}$                     | 17100             | 16000       | 16800            | 18100     | 15900       | 17000  | 16900   |
| $\Phi^{\text{d}}$                  | 0.40              | 0.34        | 0.34             | 0.047     | 0.28        | 0.055  | 0.19    |
| $\tau^{\text{e}}$                  | 4.14              | 1.89        | 1.88             | 1.05      | 3.10        | 3.01   | 1.59    |
| <b>3i</b>                          |                   |             |                  |           |             |        |         |
| $\lambda_{\text{Abs}}^{\text{a}}$  | 356.0             | 344.4       | 343.4            | 357.6     | 355.0       | 356.0  | 353.4   |
| $\lambda_{\text{Fluo}}^{\text{b}}$ | 425.4             | 407.0       | 406.7            | 434.2     | 430.6       | 432.7  | 416.7   |
| $e^{\text{c}}$                     | 18600             | 18800       | 17400            | 18600     | 19100       | 17900  | 18200   |
| $\Phi^{\text{d}}$                  | 0.79              | 0.18        | 0.14             | 0.89      | 0.85        | 0.64   | 0.51    |
| $\tau^{\text{e}}$                  | 3.08              | 5.08        |                  | 3.63      | 3.81        | 3.38   | 2.03    |
| <b>3j</b>                          |                   |             |                  |           |             |        |         |
| $\lambda_{\text{Abs}}^{\text{a}}$  | 366.4             | 356.2       | 355.6            | 367.8     | 365.8       | 367.8  | 364.6   |
| $\lambda_{\text{Fluo}}^{\text{b}}$ | 447.4             | 410.8       | 407.4            | 480.0     | 457.5       | 478.3  | 427.5   |
| $e^{\text{c}}$                     | 23700             | 26400       | 22600            | 24100     | 24600       | 22800  | 22400   |
| $\Phi^{\text{d}}$                  | 0.54              | 0.54        | 0.53             | 0.70      | 0.71        | 0.55   | 0.51    |
| $\tau^{\text{e}}$                  | 1.34              | 0.994       | 1.02             | 2.21      | 2.12        | 2.15   | 1.16    |
| <b>3l</b>                          |                   |             |                  |           |             |        |         |
| $\lambda_{\text{Abs}}^{\text{a}}$  | 364.4             | 357.6       | 354.0            | 366.0     | 369.4       | 369.0  | 364.8   |
| $\lambda_{\text{Fluo}}^{\text{b}}$ | 492.2             | 436.7       | 426.8            | 556.6     | 518.2       | 583.4  | 454.6   |
| $e^{\text{c}}$                     | 27500             | 29300       | 28300            | 27500     | 26800       | 28300  | 27500   |
| $\Phi^{\text{d}}$                  | 0.67              | 0.50        | 0.50             | 0.16      | 0.56        | 0.15   | 0.40    |
| $\tau^{\text{e}}$                  | 2.93              | 1.43        | 1.35             | 1.05      | 3.21        | 1.91   | 1.40    |

<sup>a</sup>Absorption maxima in nm; <sup>b</sup>fluorescence maxima in nm; <sup>c</sup> molar extinction coefficients in L mol<sup>-1</sup> cm<sup>-1</sup>; <sup>d</sup>fluorescence quantum yields, exc =  $\lambda_{\text{max}}$ , reference: *N,N'*-Bis(tridecan-7-yl)perylene-3,4:9,10-tetracarboxylic diimide with  $\Phi = 1.00$ ; <sup>e</sup>fluorescence lifetimes in ns.

Table SI-5. FWHM\*-values of experimental absorption and fluorescence spectra of **3** in nm.

|           | <i>n</i> -Hexane  |                    | Tetradecane       |                    | Toluene           |                    | Chloroform        |                    | 1-Undecanol       |                    | 1-Butanol         |                    | DMF               |                    |
|-----------|-------------------|--------------------|-------------------|--------------------|-------------------|--------------------|-------------------|--------------------|-------------------|--------------------|-------------------|--------------------|-------------------|--------------------|
|           | Abs. <sup>a</sup> | Fluo. <sup>b</sup> |
| <b>3a</b> | 48.4              | 58.5               | 51.6              | 59.6               | 52.0              | 60.2               | 52.2              | 63.2               | 51.8              | 67.4               | 48.8              | 67.7               | 52.2              | 66.4               |
| <b>3b</b> | 54.4              | 64.5               | 53.6              | 64.4               | 60.2              | 70.8               | 60.4              | 74.0               | 58.2              | 88.0               | 64.8              | 90.9               | 62.8              | 93.1               |
| <b>3c</b> | 76.4              | 66.2               | 79.0              | 70.8               | 88.4              | 83.8               | 85.0              | 101.0              | 92.4              | 164.1              | 109.4             | 205.0              | 93.2              |                    |
| <b>3d</b> | 54.0              | 70.4               | 59.6              | 71.2               | 62.8              | 86.6               | 64.0              | 104.1              | 61.8              | 134.9              | 66.8              | 160.1              | 68.0              |                    |
| <b>3g</b> | 83.8              | 66.4               | 76.2              | 67.1               |                   | 77.8               | 81.2              | 91.6               |                   | 122.3              | 83.4              | 141.5              |                   | 135.5              |
| <b>3h</b> | 79.2              | 68.2               | 81.8              | 67.3               |                   | 83.5               | 82.4              | 95.6               | 50.6              | 123.5              | 82.0              | 150.0              |                   | 143.0              |
| <b>3i</b> | 50.2              | 59.2               | 52.2              | 60.2               | 53.0              | 62.4               | 53.2              | 65.9               | 53.8              | 70.9               | 52.2              | 69.4               | 53.8              | 68.2               |
| <b>3j</b> | 56.4              | 57.1               | 53.2              | 57.9               | 52.8              | 60.7               | 54.6              | 71.9               | 57.9              | 87.0               | 58.8              | 89.0               | 60.2              | 90.7               |
| <b>3l</b> | 56.4              | 65.9               | 57.6              | 66.6               | 60.2              | 74.7               | 60.4              | 90.9               | 63.8              | 127.1              | 63.6              | 154.6              | 64.2              | 152.7              |

\*Full width at half maximum, experimental determination. a) FWHM of absorption in eV; b) FWHM of fluorescence in nm.

Table SI-6. FWHM\*-values of experimental absorption and fluorescence spectra of **3** in eV.

|           | <i>n</i> -Hexane  |                    | Tetradecane       |                    | Toluene           |                    | Chloroform        |                    | 1-Undecanol       |                    | 1-Butanol         |                    | DMF               |                    |
|-----------|-------------------|--------------------|-------------------|--------------------|-------------------|--------------------|-------------------|--------------------|-------------------|--------------------|-------------------|--------------------|-------------------|--------------------|
|           | Abs. <sup>a</sup> | Fluo. <sup>b</sup> |
| <b>3a</b> | 0.518             | 0.452              | 0.552             | 0.456              | 0.537             | 0.434              | 0.530             | 0.436              | 0.531             | 0.460              | 0.496             | 0.444              | 0.530             | 0.442              |
| <b>3b</b> | 0.546             | 0.443              | 0.529             | 0.435              | 0.580             | 0.433              | 0.571             | 0.419              | 0.544             | 0.466              | 0.612             | 0.446              | 0.590             | 0.454              |
| <b>3c</b> | 0.617             | 0.360              | 0.629             | 0.374              | 0.657             | 0.354              | 0.589             | 0.359              | 0.649             | 0.558              | 0.781             | 0.642              | 0.627             |                    |
| <b>3d</b> | 0.540             | 0.426              | 0.594             | 0.423              | 0.614             | 0.429              | 0.626             | 0.450              | 0.593             | 0.580              | 0.653             | 0.606              | 0.656             |                    |
| <b>3g</b> | 1.011             | 0.420              | 0.926             | 0.419              |                   | 0.411              | 0.974             | 0.423              |                   | 0.520              | 1.014             | 0.518              |                   | 0.482              |
| <b>3h</b> | 0.972             | 0.415              | 1.018             | 0.404              |                   | 0.426              | 0.983             | 0.420              | 0.547             | 0.533              | 0.982             | 0.553              |                   | 0.494              |
| <b>3i</b> | 0.531             | 0.445              | 0.547             | 0.448              | 0.542             | 0.440              | 0.534             | 0.441              | 0.546             | 0.472              | 0.526             | 0.443              | 0.541             | 0.444              |
| <b>3j</b> | 0.576             | 0.403              | 0.531             | 0.403              | 0.512             | 0.395              | 0.514             | 0.434              | 0.547             | 0.511              | 0.559             | 0.471              | 0.566             | 0.479              |
| <b>3l</b> | 0.567             | 0.436              | 0.569             | 0.433              | 0.576             | 0.435              | 0.568             | 0.451              | 0.600             | 0.584              | 0.598             | 0.603              | 0.601             | 0.548              |

\*Full width at half maximum, experimental determination. a) FWHM of absorption in eV; b) FWHM of fluorescence in eV.

## 7.2. Gaussian analysis of the fluorescence spectra of **3g** in various solvents

A Gaussian analysis on the basis of equation (SI-8)<sup>SI-7</sup> was applied to the fluorescence spectra of **3g** in the solvents chloroform, *n*-tetradecane, *n*-hexane, 1-butanol, *N,N*-dimethylformamide, 1-undecanol and toluene where  $I_{(\lambda)}$  means the intensity of fluorescence depending on the wavelengths  $\lambda$ .

$$I_{(\lambda)} = \sum_{i=0}^n I_{\max(i)} e^{-100 \frac{\left( \frac{1}{\lambda} - \frac{1}{\lambda_{\max(i)}} \right)^2}{2\sigma_{(i)}^2}} \quad (\text{SI-8})$$

$$E_{(\lambda)} = \sum_{i=0}^n E_{\max(i)} e^{-100 \frac{\left( \frac{1}{\lambda} - \frac{1}{\lambda_{\max(i)}} \right)^2}{2\sigma_{(i)}^2}} \quad (\text{SI-9})$$

$I_{\max(i)}$  means the intensity maxima of the individual Gaussian bands  $i$  with the position  $\lambda_{\max(i)}$  and the sigma width  $\sigma_{(i)}$ . The similar equation (SI-9) can be used for the light absorption with the absorptivity  $E$ . A number of  $n = 8$  Gaussian band is sufficient for the description of the fluorescence spectra of the series of **3** reported in Table SI-7. Further Gaussian bands do not improve the results.

Table SI-7. Gaussian analysis of fluorescence spectra of **3g** (300-750 nm).

| Solvent               | CHCl <sub>3</sub> | Tetradecane | <i>n</i> -Hexane | 1-Butanol | DMF   | 1-Undecanol | Toluene |
|-----------------------|-------------------|-------------|------------------|-----------|-------|-------------|---------|
| $\lambda_{\max}(1)^a$ | 365.1             | 338.2       | 338.2            | 357.3     | 372.4 | 354.3       | 373.1   |
| $2 \sigma(1)^b$       | 4.373             | 4.477       | 4.539            | 0.156     | 6.189 | 2.177       | 2.816   |
| $I_{\max}(1)^c$       | 0.001             | 0.032       | 0.004            | 0.032     | 0.033 | 0.067       | 0.033   |
| $\lambda_{\max}(2)^a$ | 385.0             | 366.2       | 361.4            | 378.6     | 422.4 | 394.0       | 399.3   |
| $2 \sigma(2)^b$       | 1.803             | 1.710       | 1.381            | 3.445     | 1.468 | 4.860       | 1.639   |
| $I_{\max}(2)^c$       | 0                 | 0.027       | 0.017            | 0.137     | 0.021 | 0.172       | 0.013   |
| $\lambda_{\max}(3)^a$ | 405.5             | 385.4       | 392.1            | 409.1     | 392.4 | 660.7       | 410.7   |
| $2 \sigma(3)^b$       | 4.160             | 0.696       | 2.233            | 6.261     | 3.521 | 26.413      | 12.789  |
| $I_{\max}(3)^c$       | 0.003             | 0.02        | 0.027            | 0.087     | 0.082 | 0.035       | 0.016   |
| $\lambda_{\max}(4)^a$ | 488.0             | 412.9       | 410.9            | 509.7     | 547.3 | 457.2       | 465.2   |
| $2 \sigma(4)^b$       | 1.695             | 0.731       | 0.556            | 3.446     | 2.307 | 4.390       | 1.455   |
| $I_{\max}(4)^c$       | 0.294             | 0.183       | 0.215            | 0.173     | 0.585 | 0.109       | 0.799   |
| $\lambda_{\max}(5)^a$ | 505.3             | 423.3       | 420.0            | 542.8     | 594.6 | 502.7       | 493.2   |
| $2 \sigma(5)^b$       | 1.798             | 0.463       | 0.362            | 1.841     | 1.766 | 2.805       | 0.971   |
| $I_{\max}(5)^c$       | 0.637             | 0.518       | 0.223            | 0.54      | 0.632 | 0.432       | 0.431   |
| $\lambda_{\max}(6)^a$ | 535.4             | 433         | 428.6            | 571.7     | 641.5 | 538.3       | 520.5   |
| $2 \sigma(6)^b$       | 1.094             | 0.321       | 0.762            | 0.956     | 0.88  | 2.179       | 1.364   |
| $I_{\max}(6)^c$       | 0.377             | 0.153       | 0.685            | 0.224     | 0.164 | 0.591       | 0.38    |
| $\lambda_{\max}(7)^a$ | 565.5             | 449.6       | 448.6            | 606.6     | 678.9 | 579.2       | 556.1   |
| $2 \sigma(7)^b$       | 0.959             | 1.303       | 0.662            | 1.809     | 0.119 | 1.379       | 0.97    |
| $I_{\max}(7)^c$       | 0.219             | 0.879       | 0.546            | 0.608     | 0.021 | 0.178       | 0.069   |
| $\lambda_{\max}(8)^a$ | 596.9             | 483.1       | 469.5            | 648.0     | 648.3 | 648.0       | 585.6   |
| $2 \sigma(8)^b$       | 1.436             | 0.762       | 1.263            | 0.02      | 0.019 | 0.02        | 1.25    |
| $I_{\max}(8)^c$       | 0.123             | 0.179       | 0.323            | 0.35      | 0.192 | 0.05        | 0.045   |
| $R^d$                 | 0.007             | 0.010       | 0.008            | 0.027     | 0.015 | 0.014       | 0.011   |

a) Calculated wavelength in nm. b) Line-width in  $10^6 \text{ cm}^{-2} (\text{kK}^2)$ . c) Calculated intensity for the global  $I_{\max} = 1.00$ . d) Residual according to equation (SI-10).

$$R = \sqrt{\frac{\int [I(\lambda)_{\text{calcd.}} - I(\lambda)_{\text{exp.}}]^2 d\lambda}{\int [I(\lambda)_{\text{exp.}}]^2 d\lambda}} \quad (\text{SI-10})$$

Table SI-8. Gaussian analysis of the absorption spectra of **3g** (250-650 nm).

| Sovent                | CHCl <sub>3</sub> | Tetradecane | <i>n</i> -Hexane | 1-Butanol | DMF   | 1-Undecanol | toluene |
|-----------------------|-------------------|-------------|------------------|-----------|-------|-------------|---------|
| $\lambda_{\max}(1)^a$ | 405.7             | 384.4       | 389.3            | 401.1     | 380.6 | 385.5       | 393.4   |
| $2 \sigma(1)^b$       | 1.435             | 1.832       | 1.288            | 9.886     | 5.998 | 4.841       | 2.677   |
| $E_{\max}(1)^c$       | 0.041             | 0.317       | 0.087            | 0.094     | 0.376 | 0.43        | 0.237   |
| $\lambda_{\max}(2)^a$ | 375.7             | 358.8       | 367.3            | 382.9     | 351.8 | 349.0       | 367.3   |
| $2 \sigma(2)^b$       | 6.800             | 1.785       | 3.126            | 4.792     | 0.923 | 1.374       | 2.552   |
| $E_{\max}(2)^c$       | 0.405             | 0.386       | 0.449            | 0.3       | 0.455 | 0.658       | 0.314   |
| $\lambda_{\max}(3)^a$ | 356.8             | 352.3       | 347.8            | 350.4     | 340.4 | 337.9       | 352.3   |
| $2 \sigma(3)^b$       | 0.427             | 0.140       | 0.751            | 1.293     | 0.517 | 0.521       | 0.623   |
| $E_{\max}(3)^c$       | 0.272             | 0.11        | 0.408            | 0.584     | 0.357 | 0.319       | 0.369   |
| $\lambda_{\max}(4)^a$ | 344.3             | 339.2       | 336.5            | 339.5     | 326.4 | 324.8       | 340.4   |
| $2 \sigma(4)^b$       | 0.630             | 0.941       | 0.441            | 0.360     | 0.984 | 0.702       | 0.574   |
| $E_{\max}(4)^c$       | 0.507             | 0.599       | 0.404            | 0.181     | 0.478 | 0.468       | 0.509   |
| $\lambda_{\max}(5)^a$ | 327.2             | 322.5       | 323.1            | 326.7     | 306.0 | 308.8       | 325.7   |
| $2 \sigma(5)^b$       | 1.374             | 0.812       | 1.042            | 1.578     | 7.163 | 5.948       | 0.844   |
| $E_{\max}(5)^c$       | 0.55              | 0.475       | 0.504            | 0.532     | 0.799 | 0.693       | 0.482   |
| $\lambda_{\max}(6)^a$ | 303.7             | 307.9       | 303.1            | 302.6     | 265.7 | 265.7       | 306.5   |
| $2 \sigma(6)^b$       | 6.872             | 4.238       | 6.968            | 7.918     | 6.26  | 6.26        | 6.375   |
| $E_{\max}(6)^c$       | 0.776             | 0.403       | 0.798            | 0.786     | 0.319 | 0.319       | 0.799   |
| $\lambda_{\max}(7)^a$ | 269.6             | 293.6       | 267.8            | 265.7     | 261.0 | 261.0       | 267.8   |
| $2 \sigma(7)^b$       | 4.382             | 10.649      | 8.907            | 6.26      | 0.716 | 0.716       | 8.907   |
| $E_{\max}(7)^c$       | 0                 | 0.484       | 0.246            | 0.319     | 0.057 | 0.057       | 0.246   |
| $\lambda_{\max}(8)^a$ | 266.1             | 260.5       | 259.6            | 261.0     | 243.0 | 243.0       | 259.6   |
| $2 \sigma(8)^b$       | 5.889             | 1.499       | 0.317            | 0.716     | 4.463 | 4.463       | 0.317   |
| $E_{\max}(8)^c$       | 0.342             | 0.174       | 0.058            | 0.057     | 0.953 | 0.953       | 0.058   |
| $R^d$                 | 0.020             | 0.025       | 0.017            | 0.027     | 0.014 | 0.029       | 0.015   |

a) Calculated wavelength in nm. b) Line-width in  $10^6 \text{ cm}^{-2} (\text{kK}^2)$ . c) Calculated absorptivities for the global  $E_{\max} = 1.00$ . d) Residual according to equation (SI-10).

The individual spectra and their Gaussian analyses are reported in the subsequent Fig. SI-10 to SI-23.

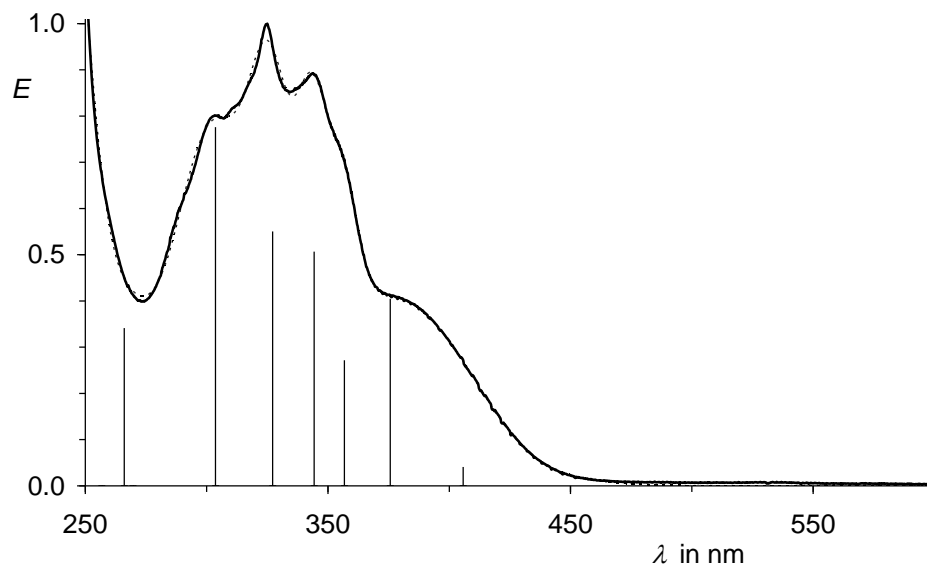

Fig. SI-10. UV/Vis absorption spectrum of **3g** in chloroform normalized to 1 in the UVB (thick, solid curve) and simulated spectrum on the basis of a Gaussian analysis (thin, dashed curve, mainly covered by the experimental spectrum). Bars: Positions and intensities of the individual Gaussian bands.

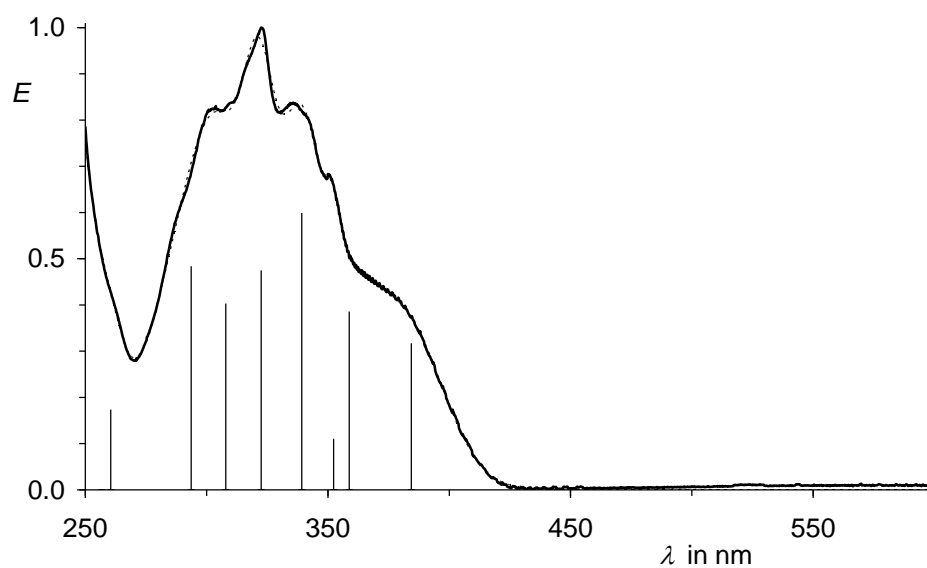

Fig. SI-11. UV/Vis absorption spectrum of **3g** in *n*-tetradecane normalized to 1 in the UVB (thick, solid curve) and simulated spectrum on the basis of a Gaussian analysis (thin, dashed curve, mainly covered by the experimental spectrum). Bars: Positions and intensities of the individual Gaussian bands.



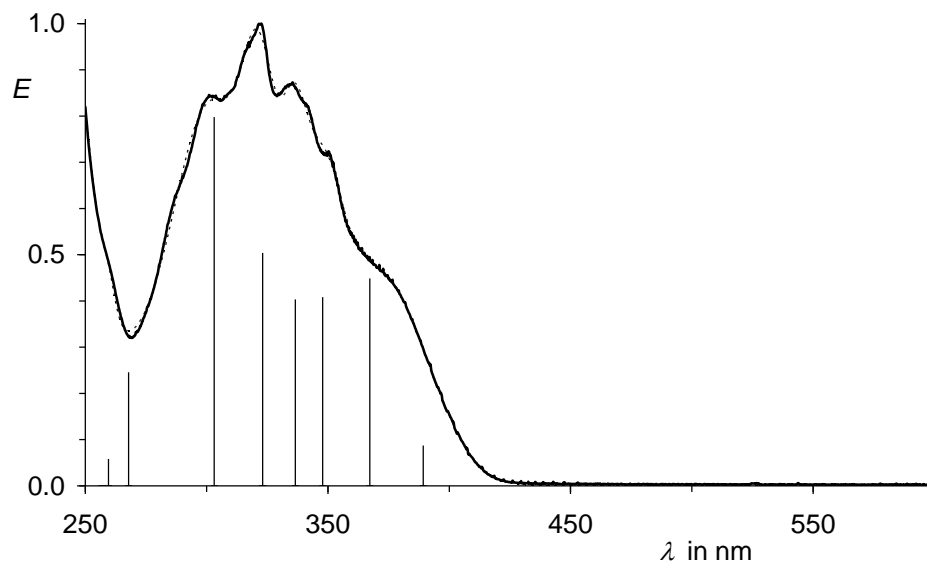

Fig. SI-12. UV/Vis absorption spectrum of **3g** in *n*-hexane normalized to 1 in the UVB (thick, solid curve) and simulated spectrum on the basis of a Gaussian analysis (thin, dashed curve, mainly covered by the experimental spectrum). Bars: Positions and intensities of the individual Gaussian bands.

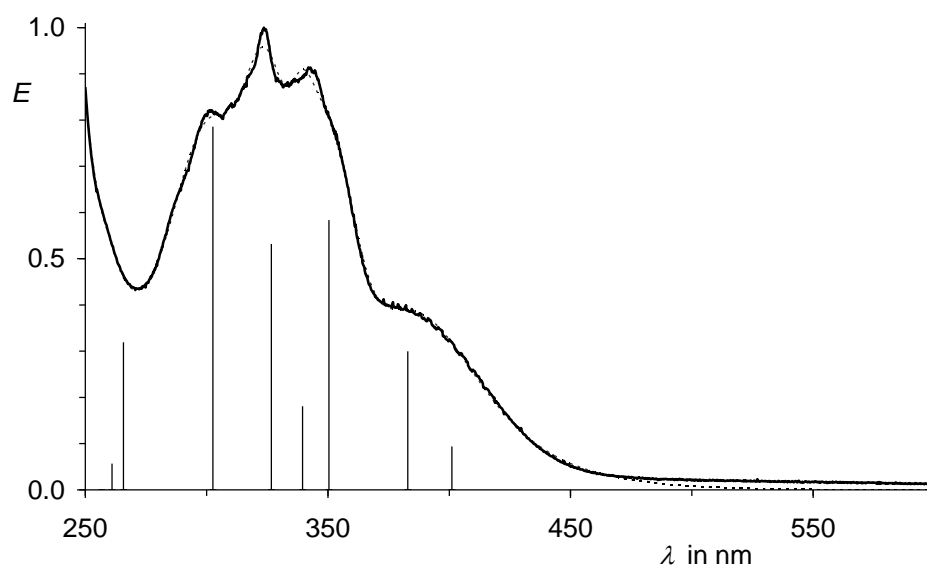

Fig. SI.13. UV/Vis absorption spectrum of **3g** in 1-butanol normalized to 1 in the UVB (thick, solid curve) and simulated spectrum on the basis of a Gaussian analysis (thin, dashed curve, mainly covered by the experimental spectrum). Bars: Positions and intensities of the individual Gaussian bands.

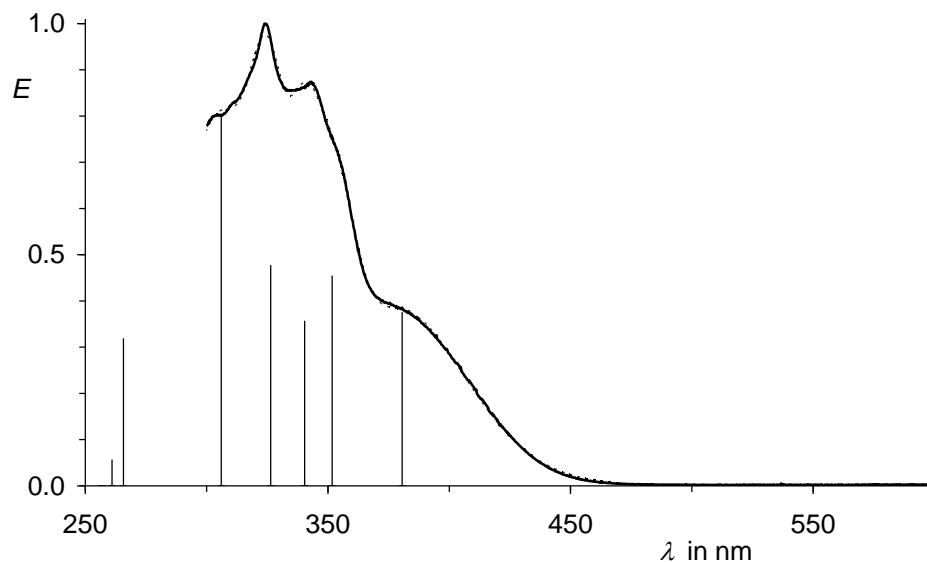

Fig. SI-14. UV/Vis absorption spectrum of **3g** in *N,N*-dimethylformamide normalized to 1 in the UVB (thick, solid curve) and simulated spectrum on the basis of a Gaussian analysis (thin, dashed curve, mainly covered by the experimental spectrum). Bars: Positions and intensities of the individual Gaussian bands.

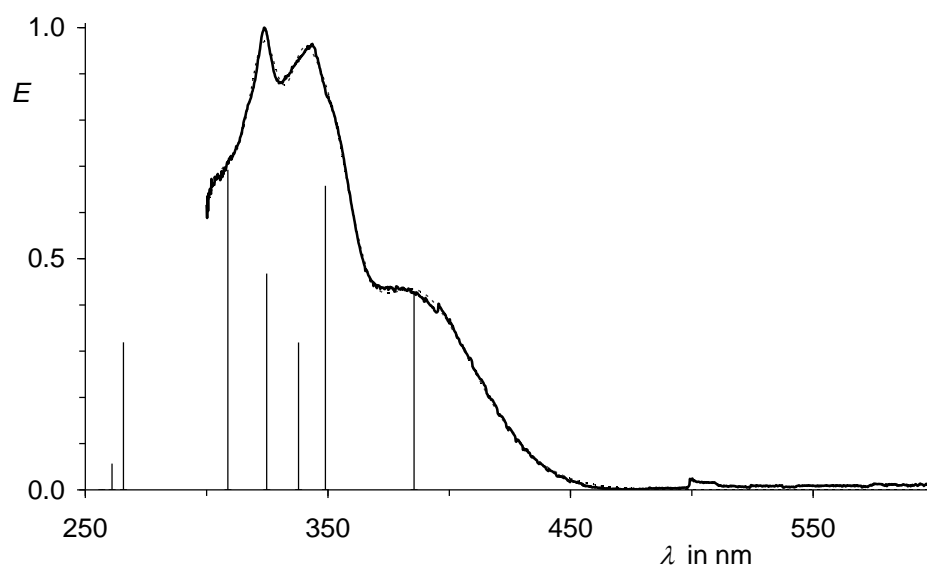

Fig. SI-15. UV/Vis absorption spectrum of **3g** in 1-undecanol normalized to 1 in the UVB (thick, solid curve) and simulated spectrum on the basis of a Gaussian analysis (thin, dashed curve, mainly covered by the experimental spectrum). Bars: Positions and intensities of the individual Gaussian bands.

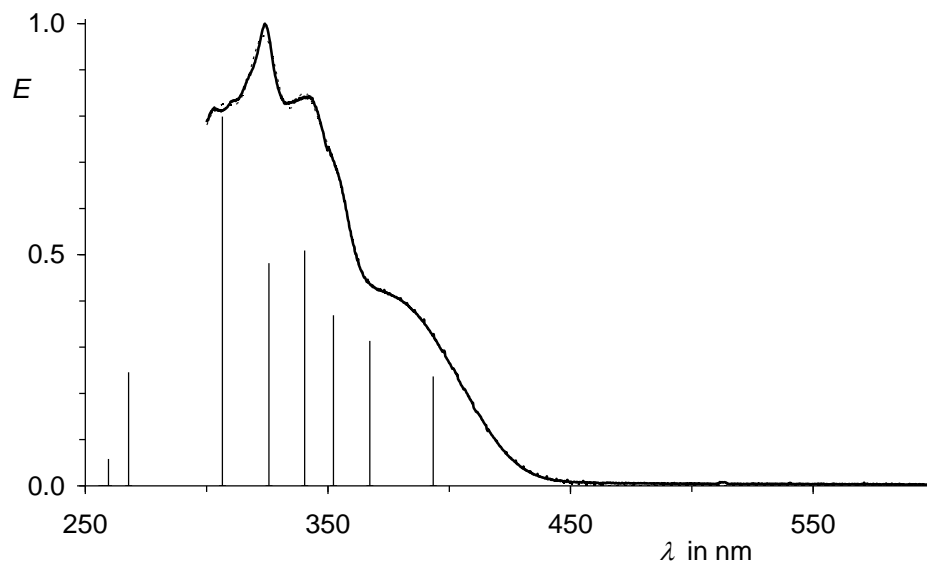

Fig. SI-16. UV/Vis absorption spectrum of **3g** in toluene normalized to 1 in the UVB (thick, solid curve) and simulated spectrum on the basis of a Gaussian analysis (thin, dashed curve, mainly covered by the experimental spectrum). Bars: Positions and intensities of the individual Gaussian bands.

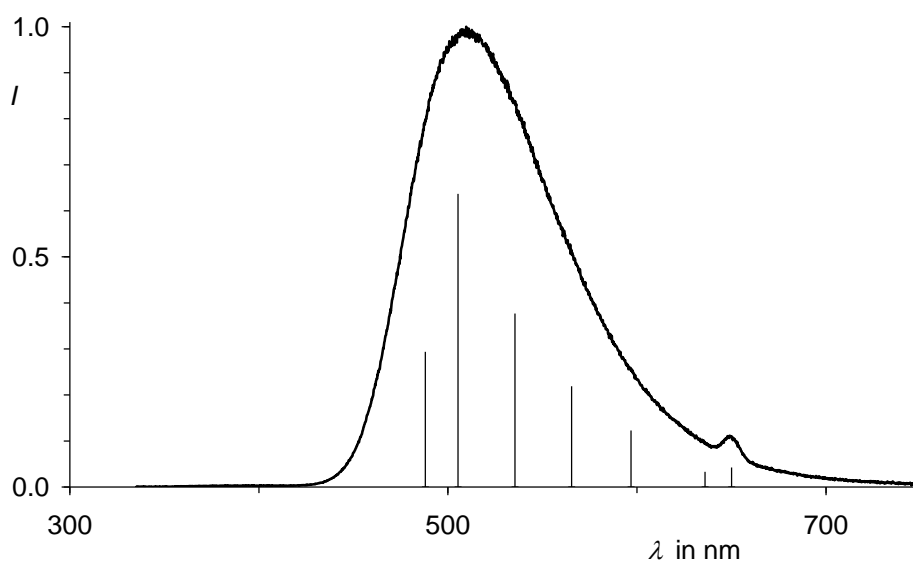

Fig. SI-17. Fluorescence spectrum of **3g** in chloroform normalized to 1 (thick, solid curve) and simulated spectrum on the basis of a Gaussian analysis (thin, dashed curve, mainly covered by the experimental spectrum). Bars: Positions and intensities of the individual Gaussian bands.

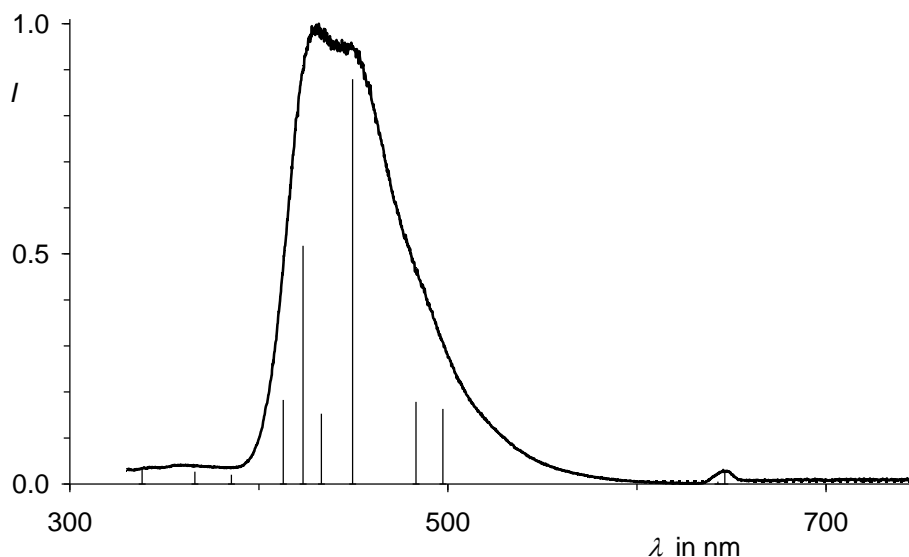

Fig. SI-18. Fluorescence spectrum of **3g** in *n*-tetradecane normalized to 1 (thick, solid curve) and simulated spectrum on the basis of a Gaussian analysis (thin, dashed curve, mainly covered by the experimental spectrum). Bars: Positions and intensities of the individual Gaussian bands.

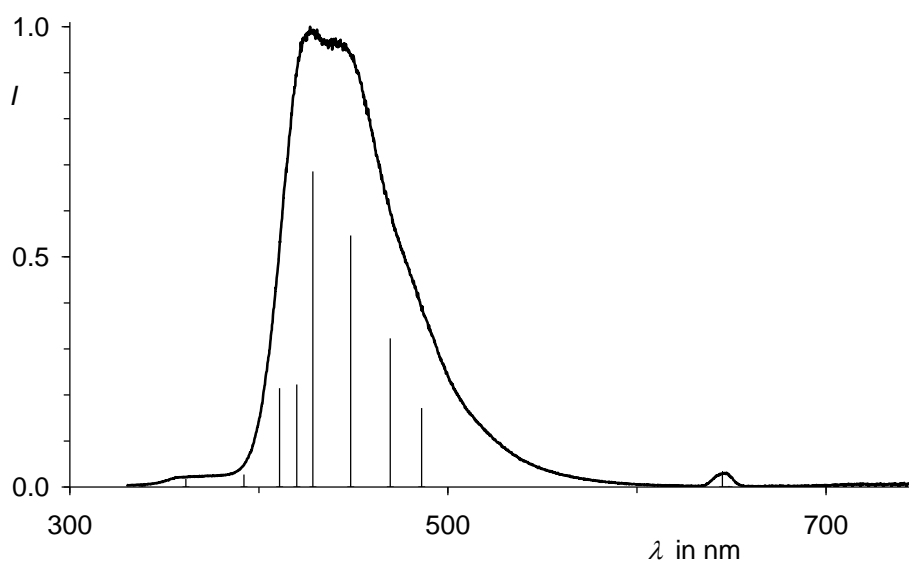

Fig. SI-19. Fluorescence spectrum of **3g** in *n*-hexane normalized to 1 (thick, solid curve) and simulated spectrum on the basis of a Gaussian analysis (thin, dashed curve, mainly covered by the experimental spectrum). Bars: Positions and intensities of the individual Gaussian bands.

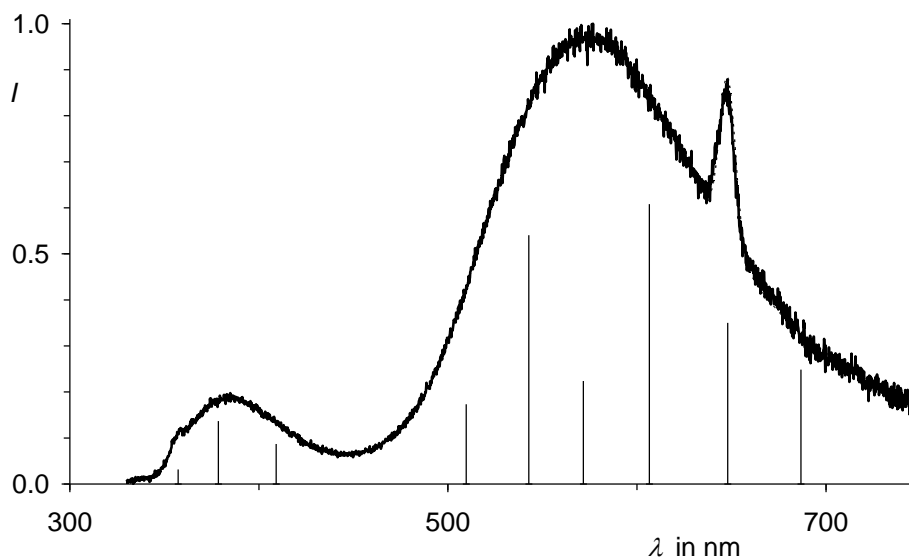

Fig. SI-20. Fluorescence spectrum of **3g** in 1-butanol normalized to 1 (thick, solid curve) and simulated spectrum on the basis of a Gaussian analysis (thin, dashed curve, mainly covered by the experimental spectrum). Bars: Positions and intensities of the individual Gaussian bands. Signal at 648 nm caused by light-scattering of the optical excitation.

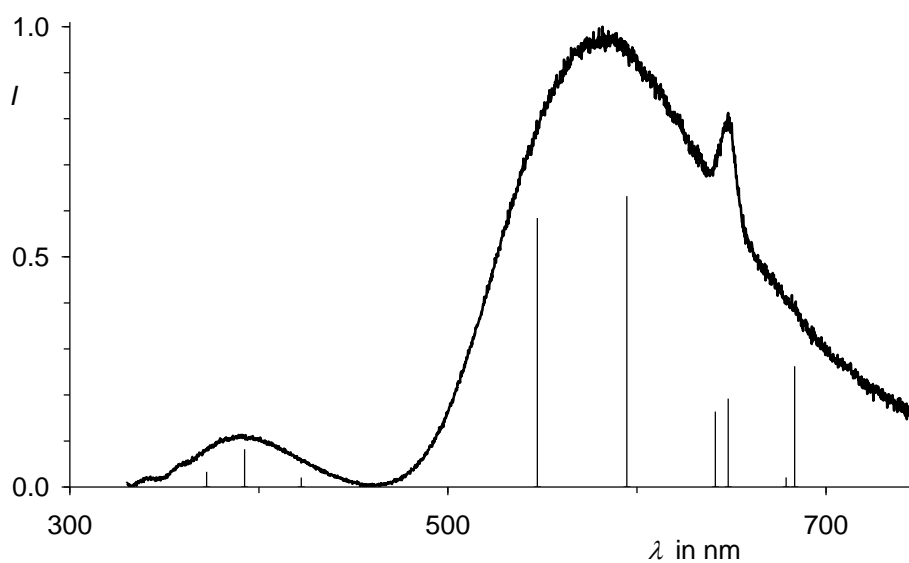

Fig. SI-21. Fluorescence spectrum of **3g** in *N,N*-dimethylformamide normalized to 1 (thick, solid curve) and simulated spectrum on the basis of a Gaussian analysis (thin, dashed curve, mainly covered by the experimental spectrum). Bars: Positions and intensities of the individual Gaussian bands. Signal at 648 nm caused by light-scattering of the optical excitation.

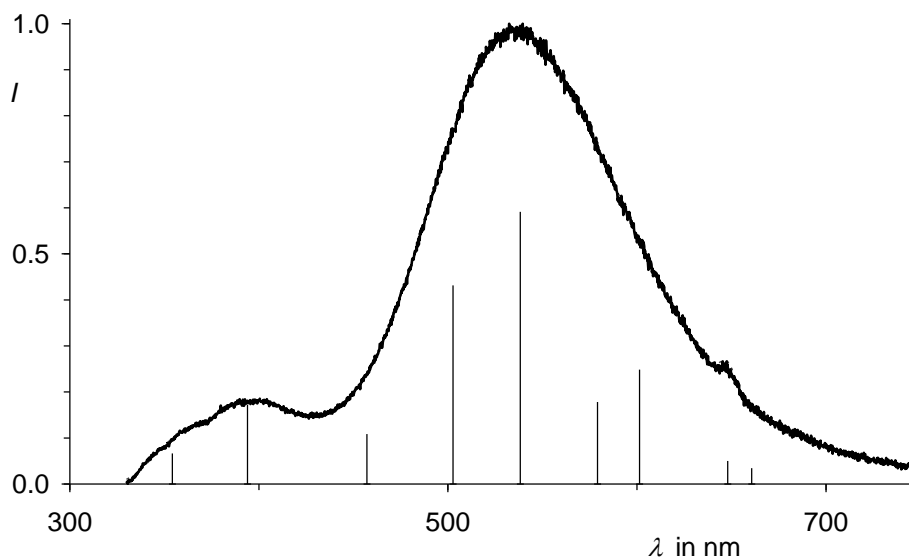

Fig. SI-22. Fluorescence spectrum of **3g** in 1-undecanol normalized to 1 (thick, solid curve) and simulated spectrum on the basis of a Gaussian analysis (thin, dashed curve, mainly covered by the experimental spectrum). Bars: Positions and intensities of the individual Gaussian bands.

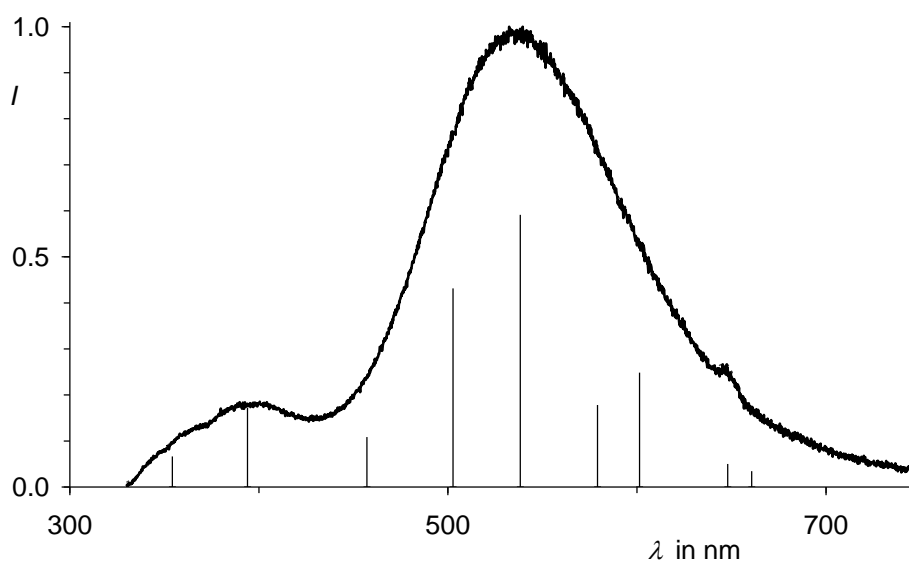

Fig. SI-23. Fluorescence spectrum of **3g** in toluene normalized to 1 (thick, solid curve) and simulated spectrum on the basis of a Gaussian analysis (thin, dashed curve, mainly covered by the experimental spectrum). Bars: Positions and intensities of the individual Gaussian bands.

## 8. Solvatochromism of 3 according to Dimroth and Reichardt

Table SI-9. Solvatochromism of the fluorescence of **3**.

|                                      |                    | 1         | 2                                  | 3     | 4          | 5       | 6                | 7           |                 |            |
|--------------------------------------|--------------------|-----------|------------------------------------|-------|------------|---------|------------------|-------------|-----------------|------------|
| Solvent                              |                    | 1-Butanol | C <sub>11</sub> H <sub>22</sub> OH | DMF   | Chloroform | Toluene | <i>n</i> -Hexane | Tetradecane | $\alpha(3-7)^a$ | $r(3-7)^b$ |
| <b>E<sub>T</sub>(30)<sup>c</sup></b> |                    | 49.7      | 47.6                               | 43.2  | 39.1       | 33.9    | 31.0             | 31.1        |                 |            |
| <b>3a</b>                            | $\lambda_{\max}^d$ | 429.1     | 420.6                              | 427.2 | 420.0      | 410.6   | 402.7            | 402.3       |                 |            |
| <b>3a</b>                            | $E_T^e$            | 66.63     | 67.98                              | 66.93 | 68.07      | 69.63   | 71.00            | 71.07       | -0.34           | -0.99      |
| <b>3b</b>                            | $\lambda_{\max}$   | 498.1     | 476.4                              | 497.2 | 459.6      | 443.2   | 424.0            | 427.8       |                 |            |
| <b>3b</b>                            | $E_T$              | 57.40     | 60.01                              | 57.50 | 62.21      | 64.51   | 67.43            | 66.83       | -0.74           | -0.99      |
| <b>3c</b>                            | $\lambda_{\max}$   | 638.4     | 610.0                              |       | 578.4      | 532.4   | 462.7            | 469.8       |                 |            |
| <b>3c</b>                            | $E_T$              | 44.79     | 46.87                              |       | 49.43      | 53.70   | 61.79            | 60.86       | -1.49           | -0.96      |
| <b>3d</b>                            | $\lambda_{\max}$   | 572.1     | 526.4                              | 618.8 | 525.1      | 492.4   | 440.2            | 442.3       |                 |            |
| <b>3d</b>                            | $E_T$              | 49.98     | 54.31                              | 46.20 | 54.45      | 58.06   | 64.95            | 64.64       | -1.43           | -0.98      |
| <b>3g</b>                            | $\lambda_{\max}$   | 576.8     | 532.4                              | 581.8 | 509.7      | 478.0   | 427.1            | 431.7       |                 |            |
| <b>3g</b>                            | $E_T$              | 49.57     | 53.70                              | 49.14 | 56.09      | 59.81   | 66.94            | 66.23       | -1.36           | -0.98      |
| <b>3h</b>                            | $\lambda_{\max}$   | 570.1     | 537.0                              | 597.8 | 522.7      | 487.0   | 434.8            | 440.2       |                 |            |
| <b>3h</b>                            | $E_T$              | 50.15     | 53.24                              | 47.83 | 54.70      | 58.71   | 65.76            | 64.95       | -1.37           | -0.99      |
| <b>3i</b>                            | $\lambda_{\max}$   | 434.2     | 430.6                              | 432.7 | 425.4      | 416.7   | 406.7            | 407.0       |                 |            |
| <b>3i</b>                            | $E_T$              | 65.85     | 66.40                              | 66.08 | 67.21      | 68.61   | 70.30            | 70.25       | -0.34           | -0.99      |
| <b>3j</b>                            | $\lambda_{\max}$   | 480.0     | 457.5                              | 478.3 | 447.4      | 427.5   | 407.4            | 410.8       |                 |            |
| <b>3j</b>                            | $E_T$              | 59.56     | 62.49                              | 59.78 | 63.90      | 66.88   | 70.18            | 69.60       | -0.80           | -0.99      |
| <b>3l</b>                            | $\lambda_{\max}$   | 556.6     | 518.2                              | 583.4 | 492.2      | 454.6   | 426.8            | 436.7       |                 |            |
| <b>3l</b>                            | $E_T$              | 51.37     | 55.17                              | 49.01 | 58.09      | 62.89   | 66.99            | 65.47       | -1.33           | -0.98      |

<sup>a</sup> Slope of the linear correlation between the  $E_T$  values and the  $E_T(30)$  values for the solvents Nr. 3-7; <sup>b</sup> Correlation number of the linear correlation between the  $E_T$  values and the  $E_T(30)$  values for the solvents Nr. 3-7; <sup>c</sup>  $E_T$  values of the pentaphenylpyridiniumphenolate Nr. 30; <sup>d</sup> fluorescence maxima in nm; <sup>e</sup> molar energy of fluorescence emission in kcal/mol.

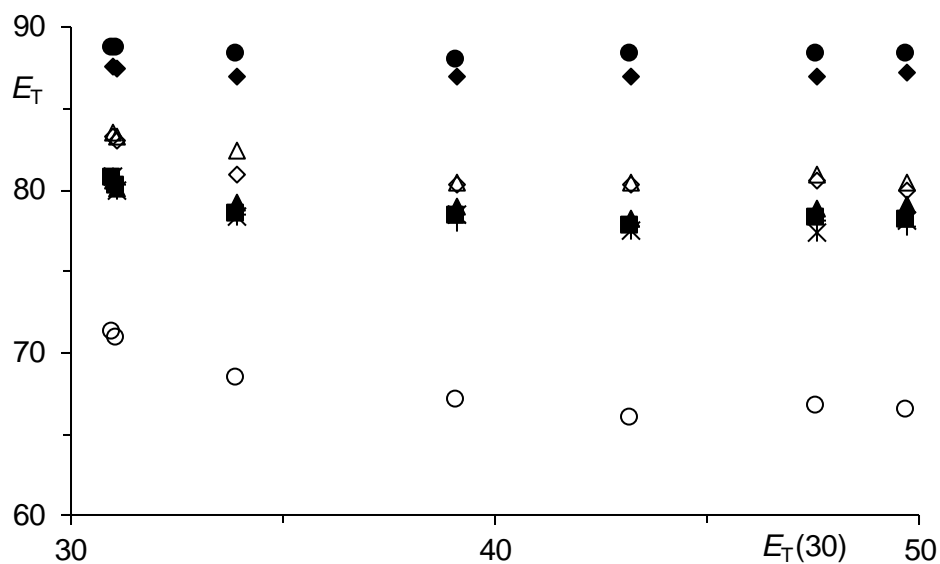

Fig. SI-24. Weak solvatochromism of the absorption of naphthalimides as indicated by plots with the  $E_T(30)$  values in kcal/mol.  $E_T = 28591/\lambda_{\max}$  (absorption in kcal). From left to right: Solvents *n*-hexane, *n*-tetradecane, toluene, chloroform, dimethylformamide, 1-undecanol and 1-butanol. Filled circles **3g**, filled squares **3b**, filled triangles **3d**, filled diamonds **3h**, stars **3l**, open diamonds **3i**, crosses **3j**, open circles **3c**, open triangles **3a**.



## 9. Additional optical spectra

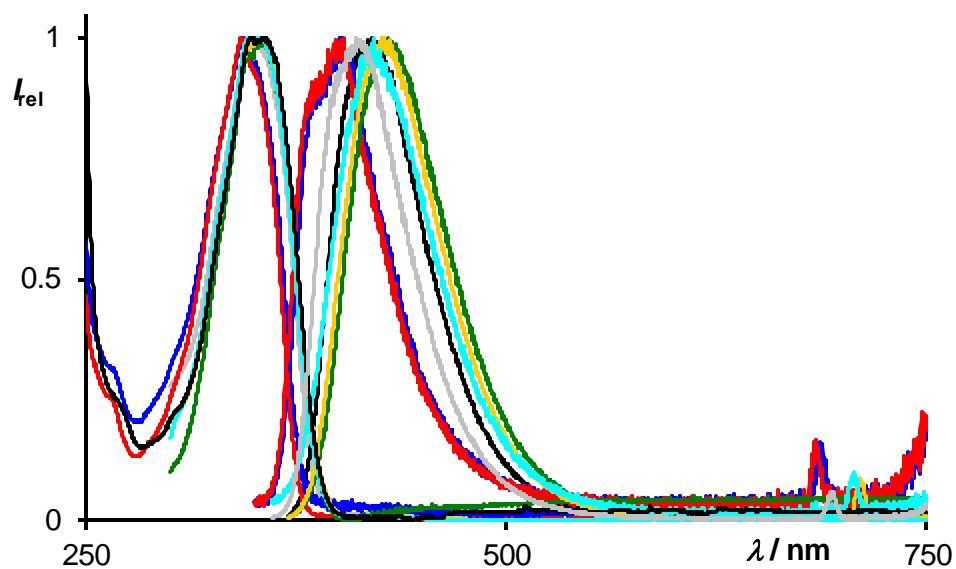

Fig. SI-25. Absorption and fluorescence spectra of **3a**. Applied solvents: *n*-hexane (red), *n*-tetradecane (blue), toluene (grey), chloroform (black), 1-undecanol (turquoise) DMF (yellow), 1-butanol (green).

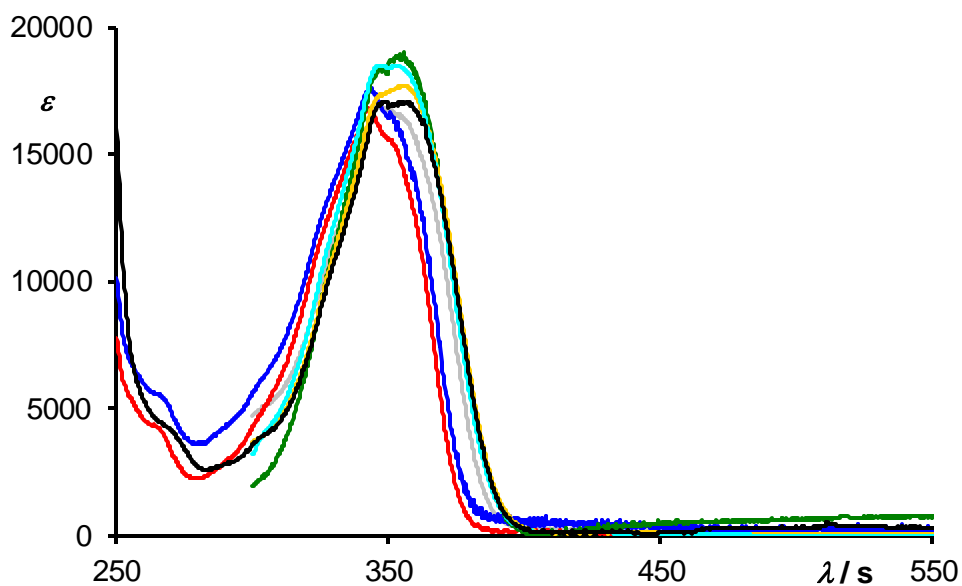

Fig. SI-26. Absolute absorption spectra of **3a**. Molar extinction is given in L mol<sup>-1</sup> cm<sup>-1</sup>. Applied solvents: *n*-hexane (red), *n*-tetradecane (blue), toluene (grey), chloroform (black), 1-undecanol (turquoise) DMF (yellow), 1-butanol (green).

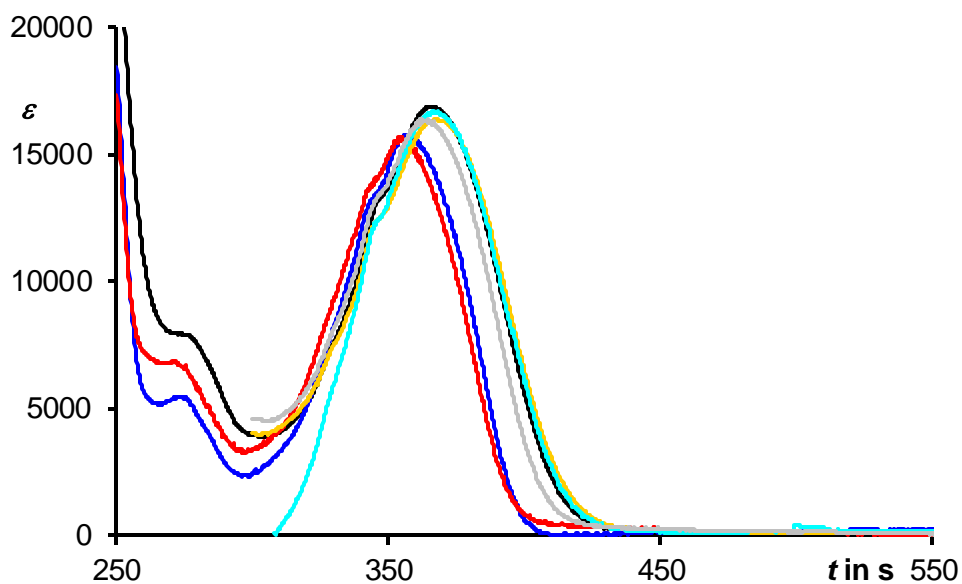

Fig. SI-27. Absolute absorption spectra of **3b**. Molar extinction is given in  $\text{L mol}^{-1} \text{cm}^{-1}$ . Applied solvents: *n*-hexane (red), *n*-tetradecane (blue), toluene (grey), chloroform (black), 1-undecanol (turquoise) DMF (yellow), 1-butanol (green).

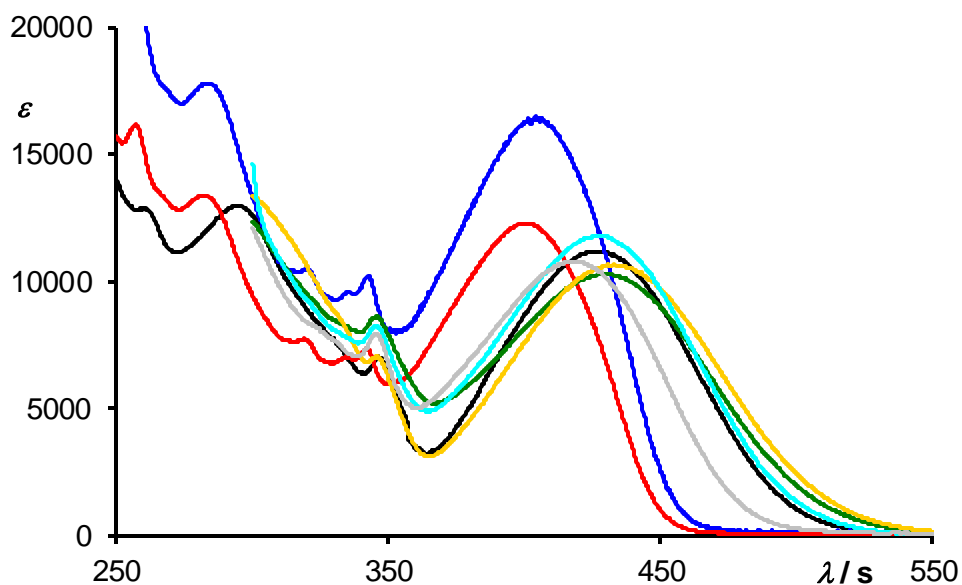

Fig. SI-28. Absolute absorption spectra of **3c**. Molar extinction is given in  $\text{L mol}^{-1} \text{cm}^{-1}$ . Applied solvents: *n*-hexane (red), *n*-tetradecane (blue), toluene (grey), chloroform (black), 1-undecanol (turquoise) DMF (yellow), 1-butanol (green).

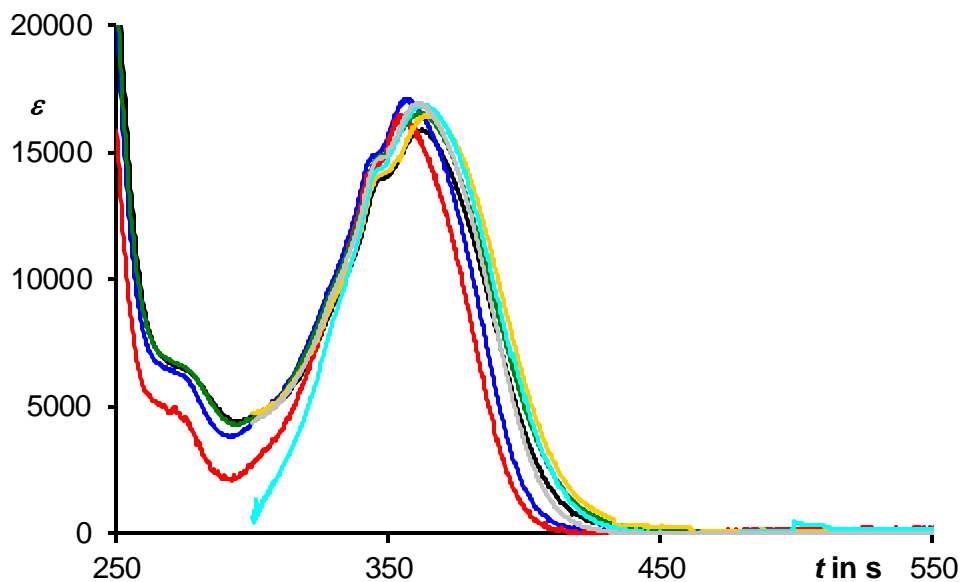

Fig. SI-29. Absolute absorption spectra of **3d**. Molar extinction is given in  $\text{L mol}^{-1} \text{cm}^{-1}$ . Applied solvents: *n*-hexane (red), *n*-tetradecane (blue), toluene (grey), chloroform (black), 1-undecanol (turquoise) DMF (yellow), 1-butanol (green).

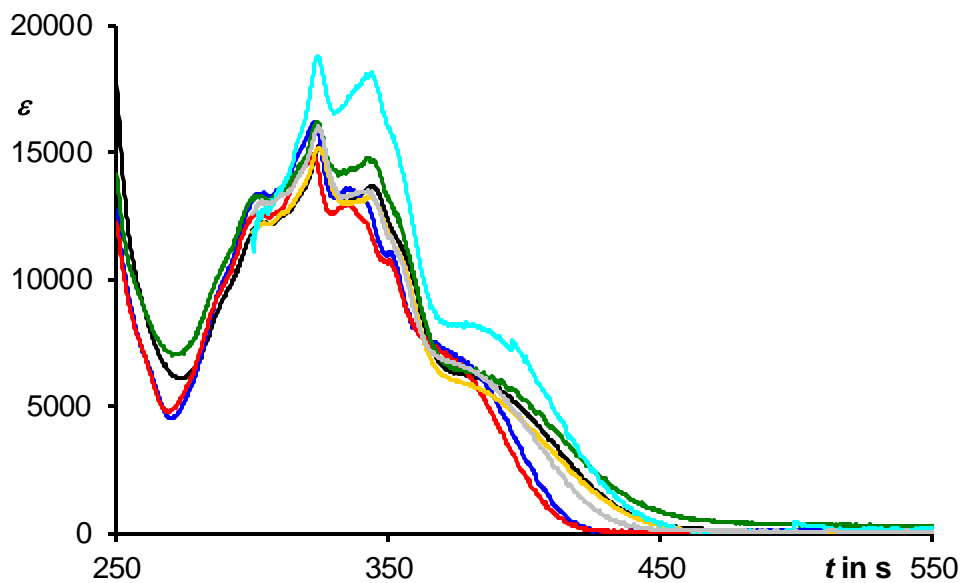

Fig. SI-30. Absolute absorption spectra of **3g**. Molar extinction is given in  $\text{L mol}^{-1} \text{cm}^{-1}$ . Applied solvents: *n*-hexane (red), *n*-tetradecane (blue), toluene (grey), chloroform (black), 1-undecanol (turquoise) DMF (yellow), 1-butanol (green).

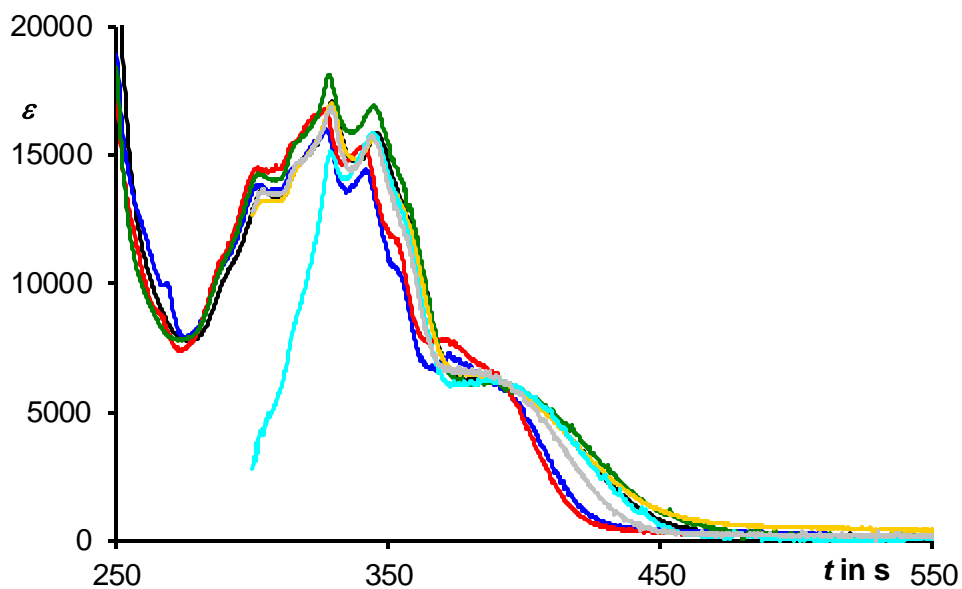

Fig. SI-31. Absolute absorption spectra of **3h**. Molar extinction is given in  $\text{L mol}^{-1} \text{cm}^{-1}$ . Applied solvents: *n*-hexane (red), *n*-tetradecane (blue), toluene (grey), chloroform (black), 1-undecanol (turquoise) DMF (yellow), 1-butanol (green).

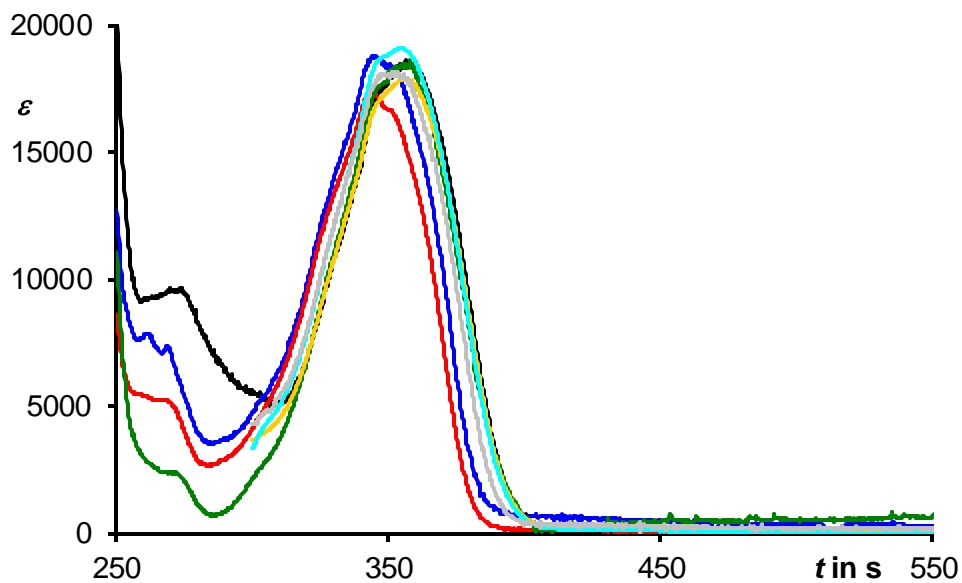

Fig. SI-32. Absolute absorption spectra of **3i**. Molar extinction is given in  $\text{L mol}^{-1} \text{cm}^{-1}$ . Applied solvents: *n*-hexane (red), *n*-tetradecane (blue), toluene (grey), chloroform (black), 1-undecanol (turquoise) DMF (yellow), 1-butanol (green).

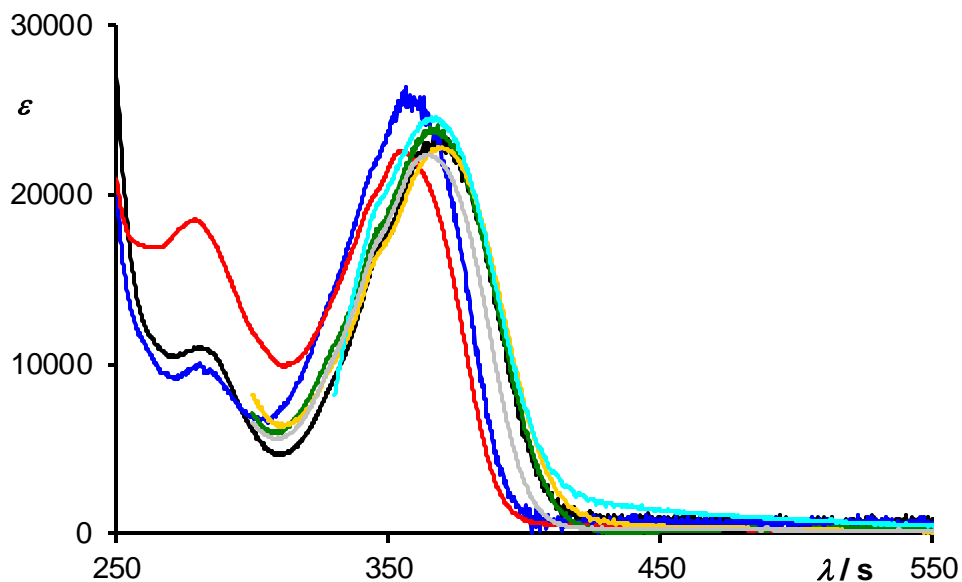

Fig. SI-33. Absolute absorption spectra of **3j**. Molar extinction is given in  $\text{L mol}^{-1} \text{cm}^{-1}$ . Applied solvents: *n*-hexane (red), *n*-tetradecane (blue), toluene (grey), chloroform (black), 1-undecanol (turquoise) DMF (yellow), 1-butanol (green).

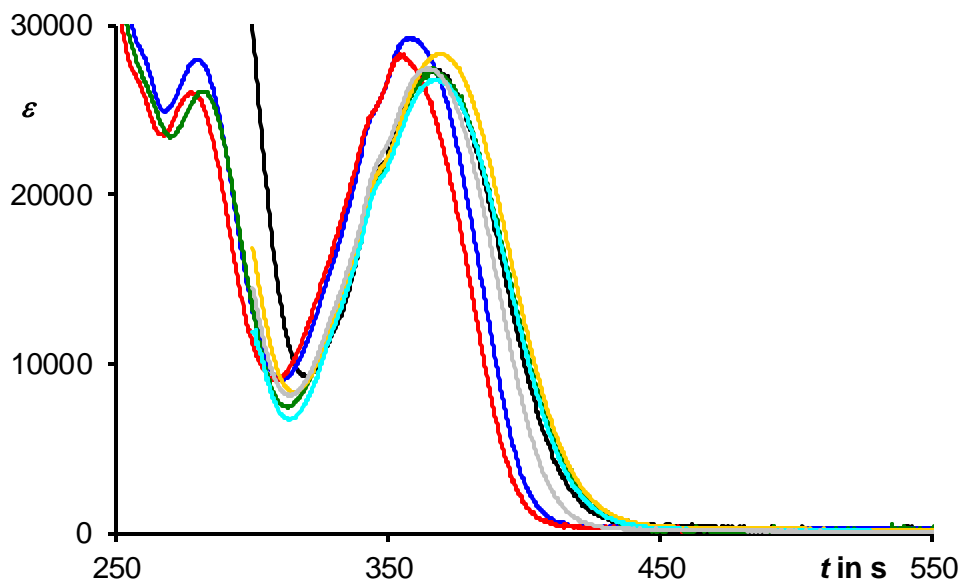

Fig. SI-34. Absolute absorption spectra of **3l**. Molar extinction is given in  $\text{L mol}^{-1} \text{cm}^{-1}$ . Applied solvents: *n*-hexane (red), *n*-tetradecane (blue), toluene (grey), chloroform (black), 1-undecanol (turquoise) DMF (yellow), 1-butanol (green).

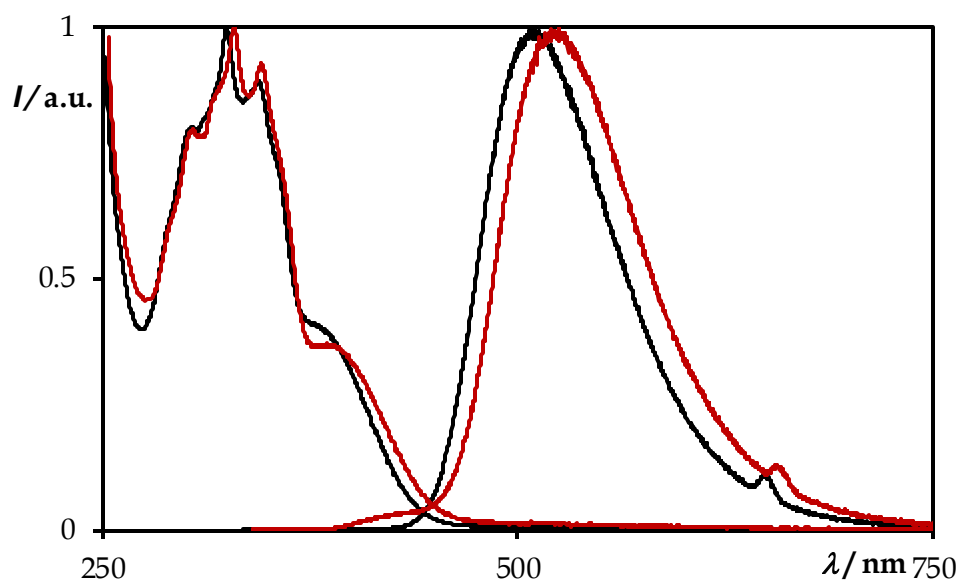

Fig. SI-35. Comparison of absorption (left) and fluorescence (right) spectra of **3g** (black) and **3h** (red) in  $\text{CHCl}_3$ .

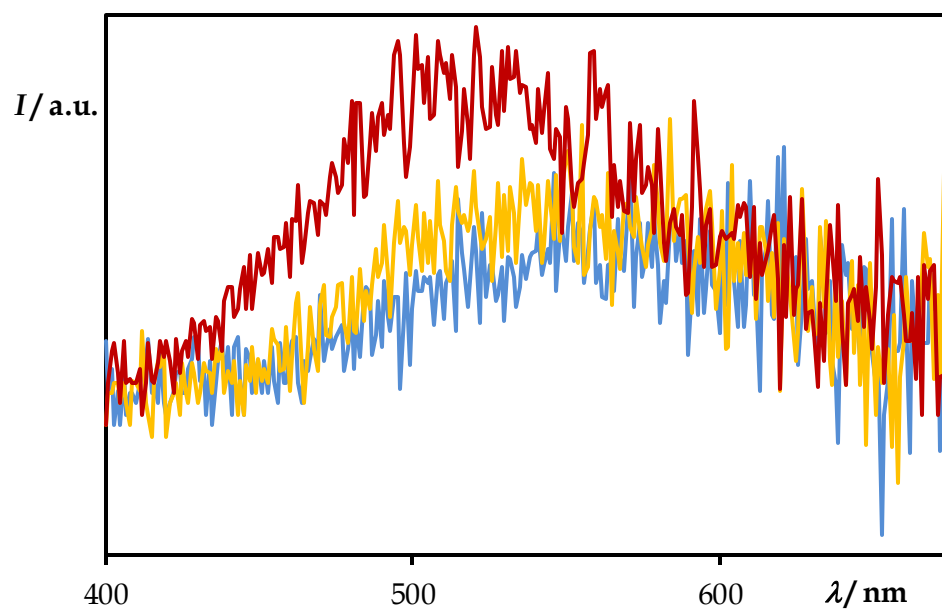

Fig. SI-36. Temperature dependent fluorescence spectra of **3f** in diethylene glycol diethyl ether. Room temperature (blue), approx. 100 °C (yellow), reflux, approx. 200 °C (red).

## 10. Quantum chemical calculations

Table SI-10. Calculated energies of HOMO and LUMO and comparison to experimental data of **3**.

| Dye       | $E_{\text{HOMO}}^{\text{a}}$ | $E_{\text{LUMO}}^{\text{a}}$ | $E_{\text{HOMO}}(E_1)^{\text{b}}$ | $E_{\text{LUMO}}(E_1)^{\text{b}}$ | $E_{\text{abs}}^{\text{c}}$ | $\lambda_{\text{abs}}(\text{calc.})^{\text{d}}$ | $\lambda_{\text{abs}}(\text{meas.})^{\text{e}}$ |
|-----------|------------------------------|------------------------------|-----------------------------------|-----------------------------------|-----------------------------|-------------------------------------------------|-------------------------------------------------|
| <b>3a</b> | -6.667                       | -2.884                       | -8.027                            | 0.082                             | 3.782383                    | 327.8                                           | 355.4                                           |
| <b>3b</b> | -6.395                       | -2.803                       | -7.771                            | 0.166                             | 3.591903                    | 345.2                                           | 364.8                                           |
| <b>3c</b> | -5.606                       | -2.667                       | -7.211                            | 0.354                             | 2.93883                     | 421.9                                           | 426.2                                           |
| <b>3d</b> | -6.340                       | -2.857                       | -7.837                            | 0.082                             | 3.483057                    | 356.0                                           | 362.2                                           |
| <b>3g</b> | -6.095                       | -2.830                       | -7.510                            | 0.245                             | 3.265366                    | 379.7                                           | 325.0                                           |
| <b>3f</b> | -6.177                       | -2.857                       | -7.592                            | 0.082                             | 3.319789                    | 373.5                                           | 364.4                                           |
| <b>3h</b> | -5.987                       | -2.830                       | -7.347                            | 0.272                             | 3.156521                    | 392.8                                           | 329.0                                           |
| <b>3i</b> | -6.640                       | -2.857                       | -7.946                            | 0.082                             | 3.782383                    | 327.8                                           | 356.0                                           |
| <b>3j</b> | -6.993                       | -3.184                       | -8.354                            | -0.327                            | 3.809594                    | 325.5                                           | 366.4                                           |
| <b>3l</b> | -6.531                       | -2.857                       | -8.296                            | 0.199                             | 3.673537                    | 337.5                                           | 344.8                                           |

Applied solvents: *n*-tetradecane, *n*-hexane, toluene, chloroform, dimethylformamide (DMF);

a) Calculated energy of HOMO and LUMO in eV in the electronic ground state, respectively (B3LYP 6-331\*\*G); b) Calculated energy of HOMO and LUMO in eV in the electronically excited state, respectively (CIS B3LYP 6-331\*\*G); c) Calculated energetic HOMO-LUMO difference in eV (DFT B3LYP 6-311\*\*G); d) Calculated energetic HOMO-LUMO difference in nm; e) Experimentally determined absorption maxima in chloroform.

Table SI-11 Quantumchemical calculations of **3**.

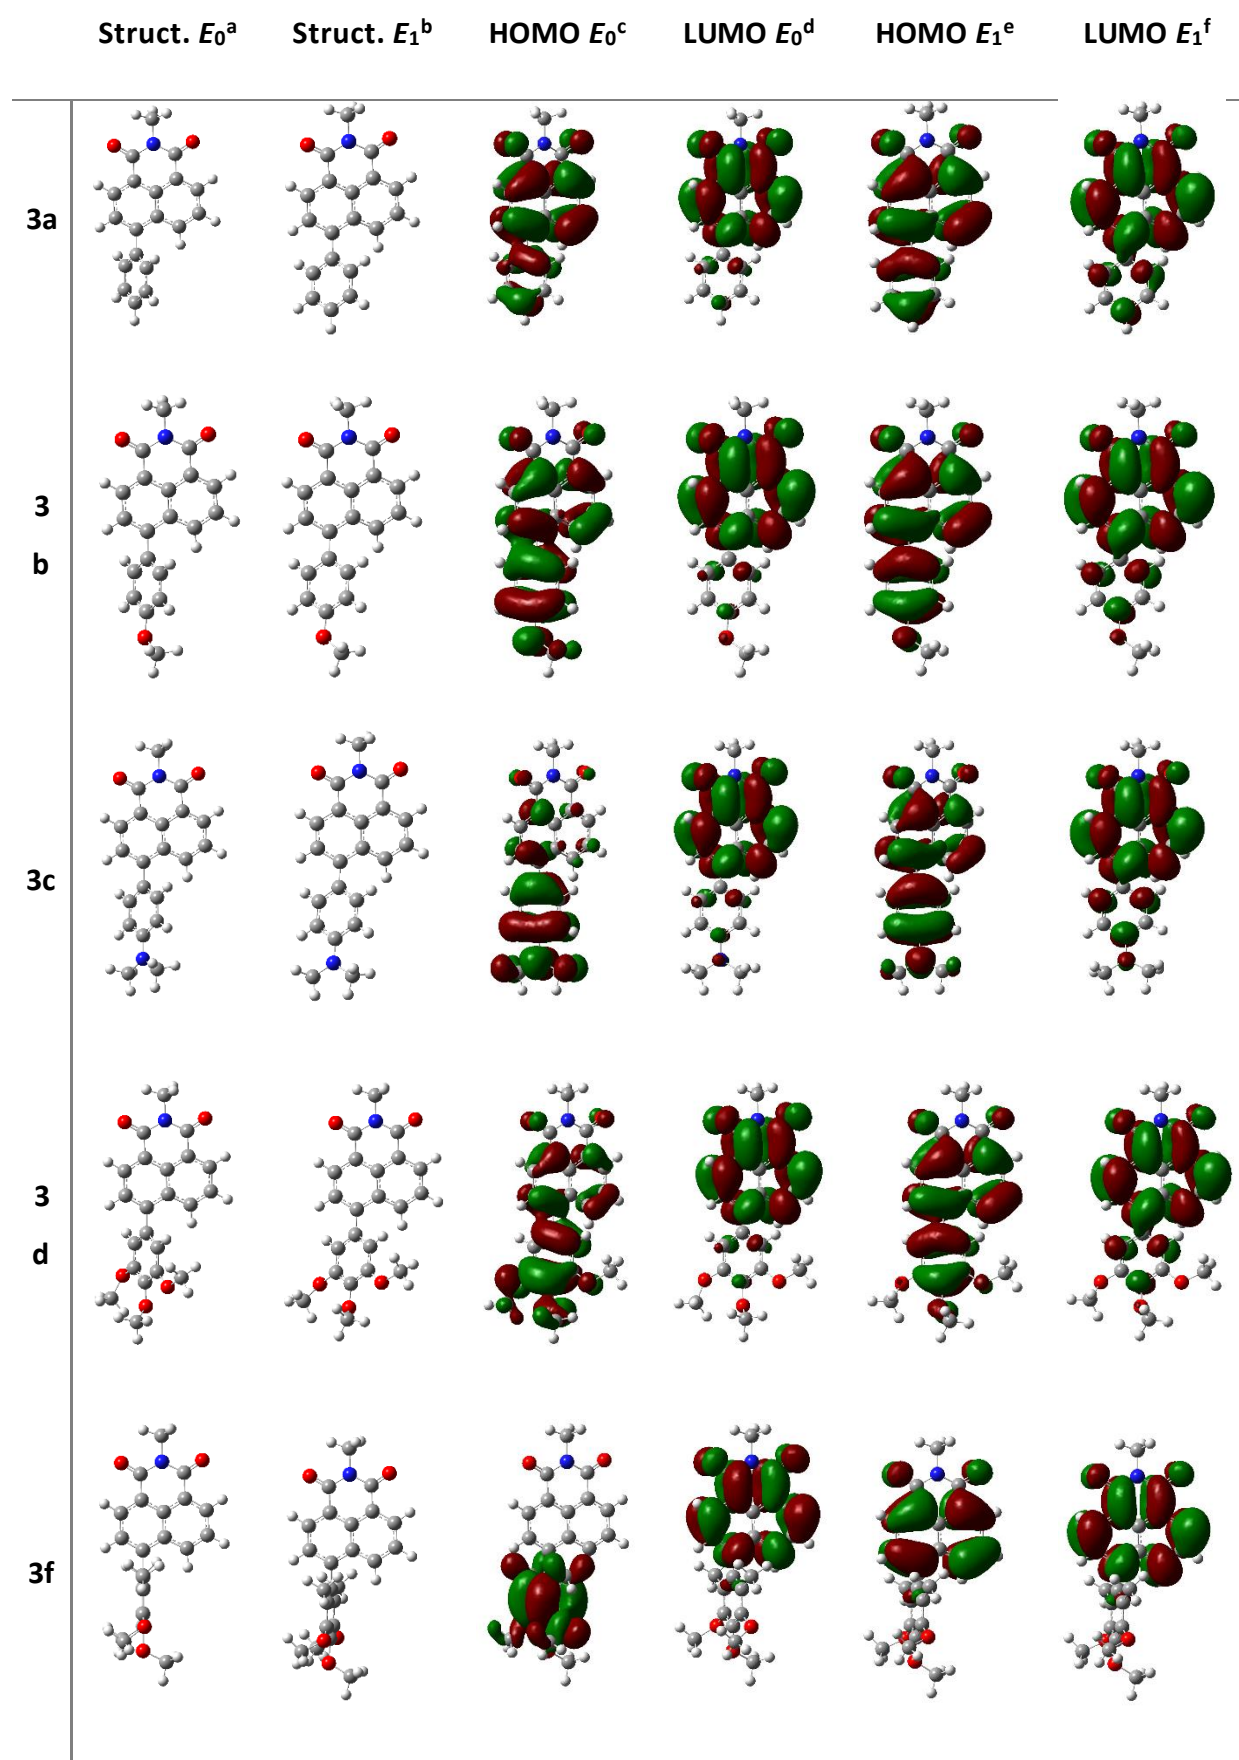



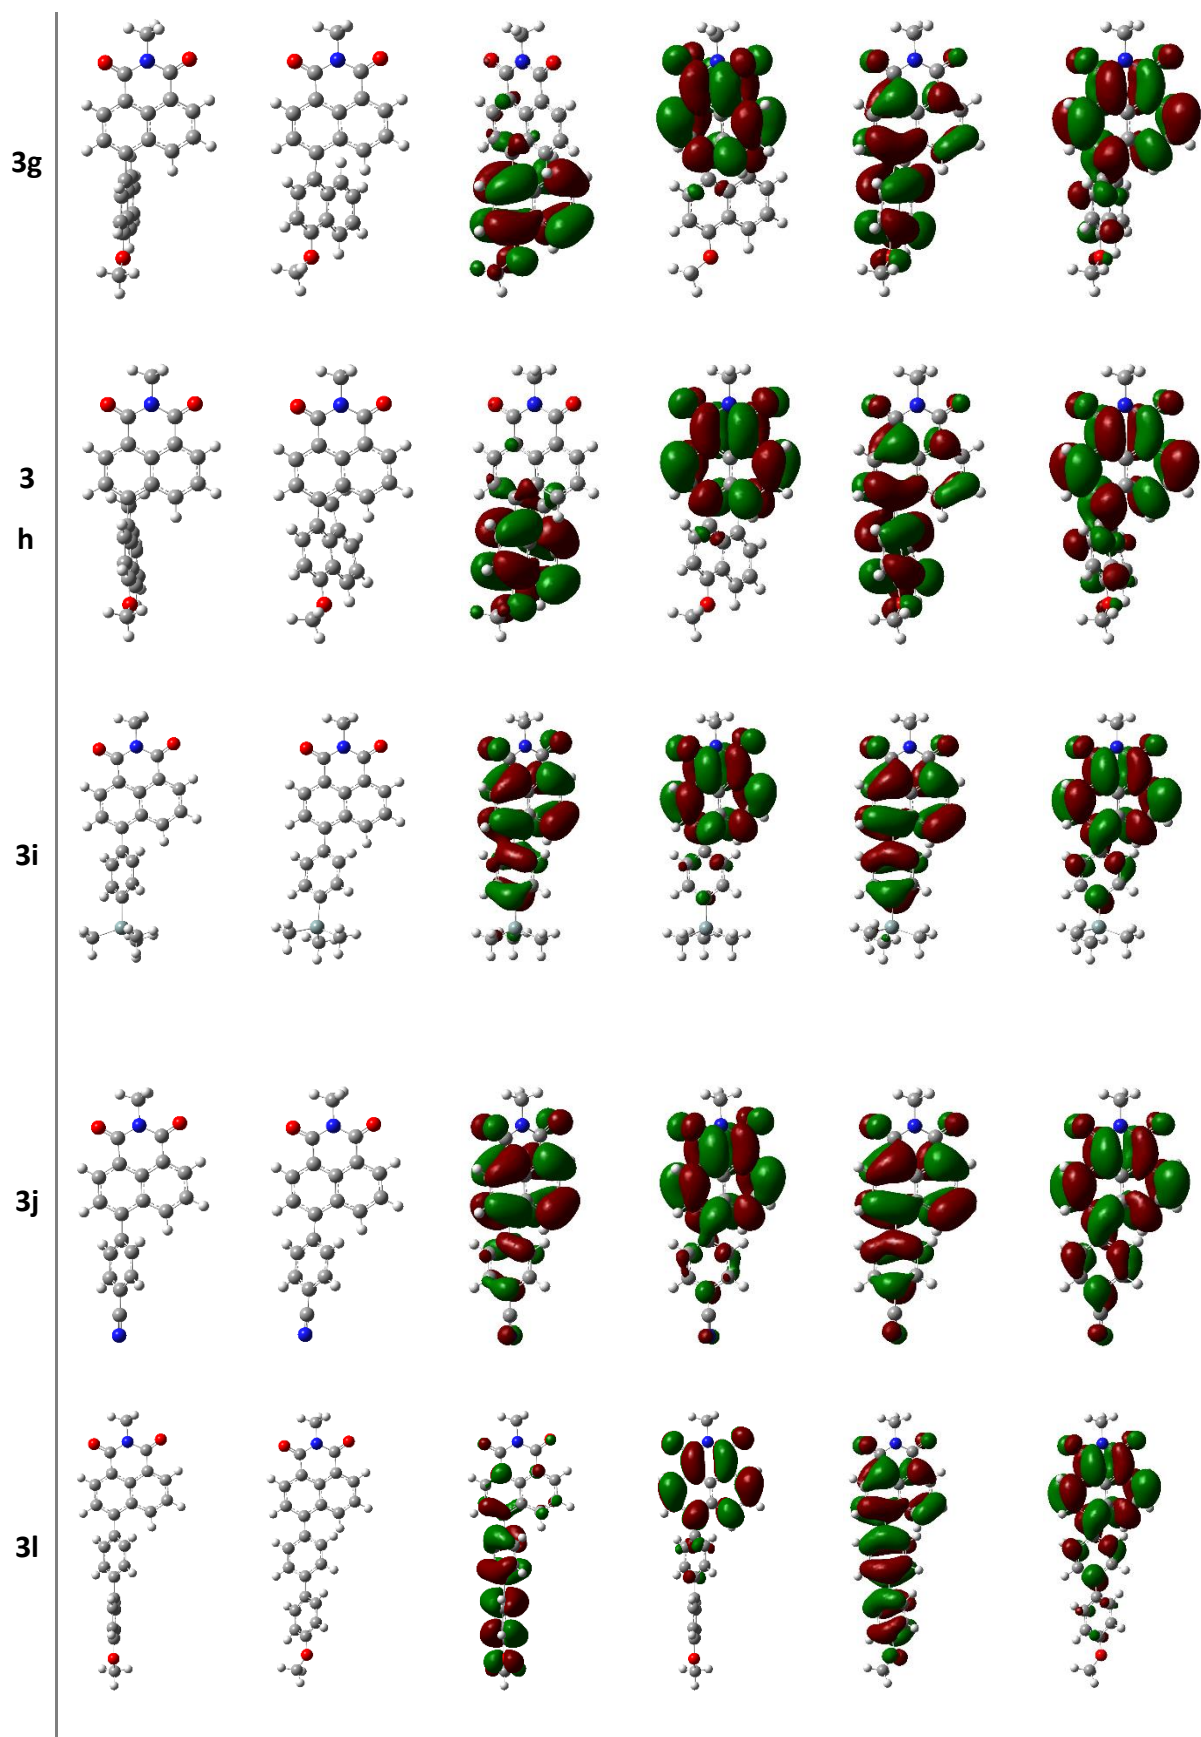

Optimized structures and electron density of HOMO and LUMO (DFT B3LYP 6-311\*\*G and CIS 6-311\*\*G basis set). a) Optimized structure in electronic groundstate; b) Optimized structure in electronically excited state; c) HOMO in groundstate; d) LUMO in ground state; e) HOMO in excited state; f) LUMO in excited state.

## 11. References

- SI-1 A. K. Banerjee, P. S. Poon, M. S. Laya, J. A. Azocar, *Russ. J. Gen. Chem.*, 2003, **73**, 1815.
- SI-2 a) Y. Cai, Z. Guo, J. Chen, W. Li, L. Zhong, Y. Gao, L. Jiang, L. Chi, H. Tian, W.-H. Zhu, *J. Am. Chem. Soc.*, 2016, **138**, 2219; b) T. Ishiyama, M. Murata, N. Miyaura, *J. Org. Chem.*, 1995, **60**, 7508.
- SI-3 H. Langhals, A. Hofer, *Ger. Offen.* (2014), DE 102012023247 A1 20140626, *Chem. Abstr.*, 2014, **161**, 159273; *PCT Int. Appl.* (2014), WO 2014083011 A2 20140605, *Chem. Abstr.*, 2014, **161**, 43086.
- SI-4 A. Kawski, P. Bojarski, B. Kukliński, *Chem. Phys. Lett.*, 2008, **463**, 410.
- SI-5 J.-L. M. Abboud, R. W. Taft, M. J. Kamlet, *J. Chem. Soc. Perkin Trans. II*, 1985, 815.
- SI-6 J. Catalán, *J. Phys. Chem. B*, 2009, **113**, 5951.
- SI-7 H. Langhals, *Anal. Bioanal. Chem.*, 2002, **374**, 573.
